# Supplementary material
Source: MDPI journal article supplement (https://www.mdpi.com/2073-4344/11/12/1477)
Supplement: s1 [file s1]

Supplementary Materials

# One-Pot Tandem Catalytic Epoxidation—CO<sub>2</sub> Insertion of Monounsaturated Methyl Oleate to the Corresponding Cyclic Organic Carbonate

Roberto Calmanti, Nicola Sargentoni, Maurizio Selva and Alvise Perosa\*

Dipartimento di Scienze Molecolari e Nanosistemi, Università Ca' Foscari Venezia, Via Torino 155, 30172 Venezia Mestre, Italy; alvise@unive.it

## Characterization of Ionic Liquids

*Trioctylmethylammonium-methyl carbonate* [*N*<sub>8,8,8,1</sub>](CH<sub>3</sub>OCOO)

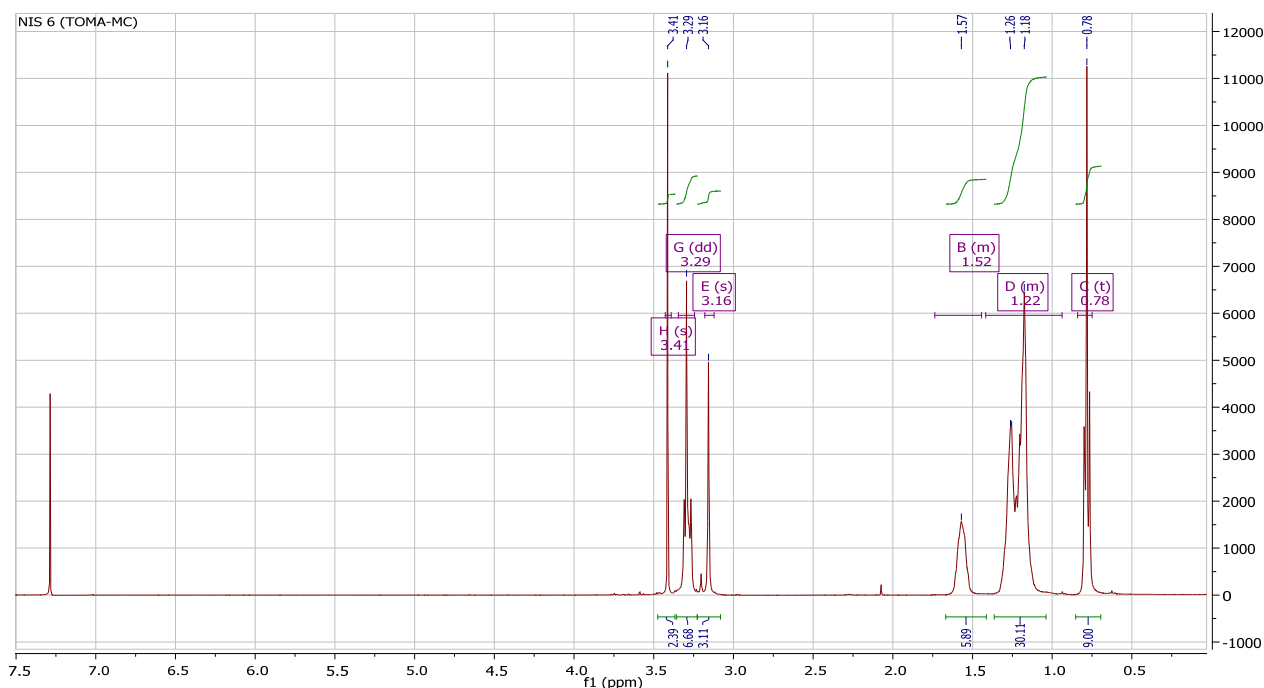

**Figure S1.** <sup>1</sup>H-NMR (400MHz, CDCl<sub>3</sub>): δ = 0.78 (t, J=6.90, 9H), 1.18 (m, 30H), 1.57 (m, 6H), 3.16 (s, 3H), 3.29 (dd, J=5.56, 11.40Hz, 6H), 3.40 (s, 3H).

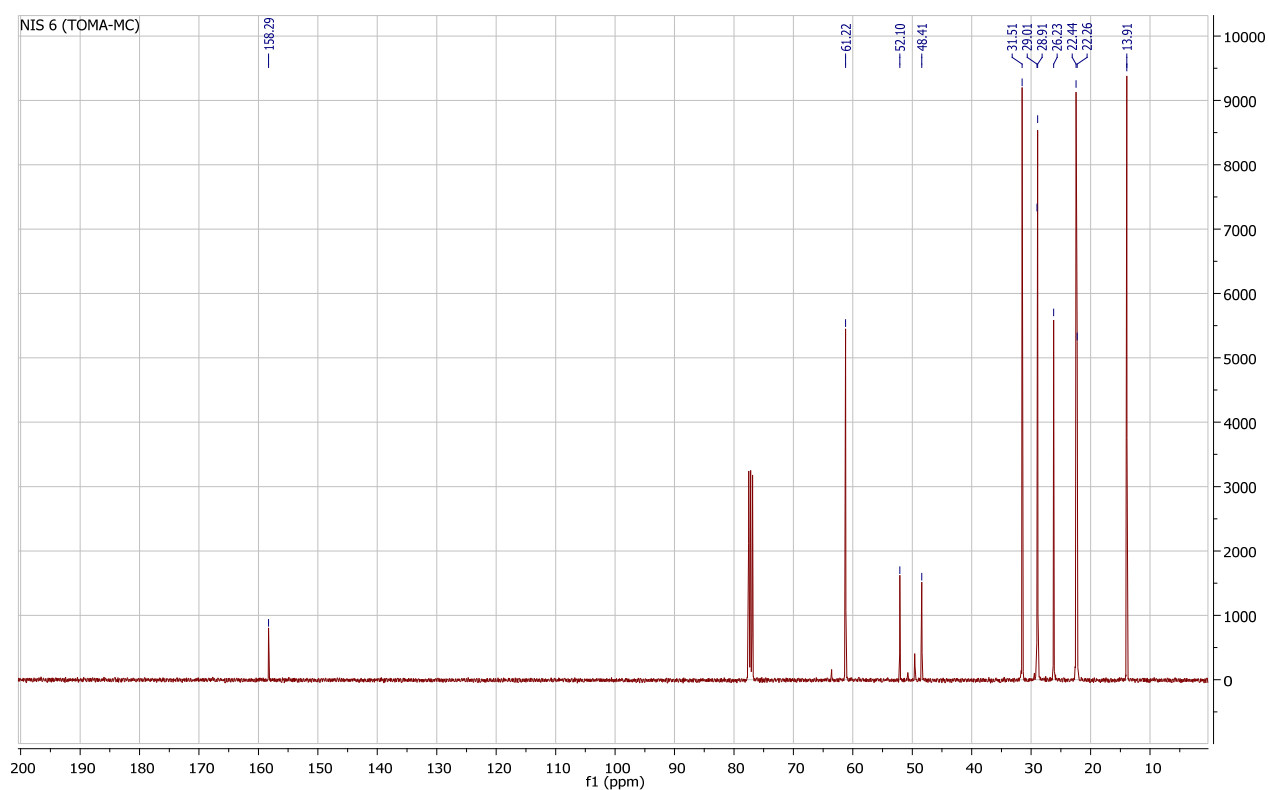

Figure S2.  $^{13}\text{C}$ -NMR (100MHz,  $\text{CDCl}_3$ ):  $\delta = 13.91, 22.26, 22.44, 26.33, 28.91, 29.01, 31.51, 48.41, 52.10, 61.22, 158.29$ .

*Trioctylmethylphosphonium-methyl carbonate*  $[\text{P}_{8,8,1}](\text{CH}_3\text{OCOO})$

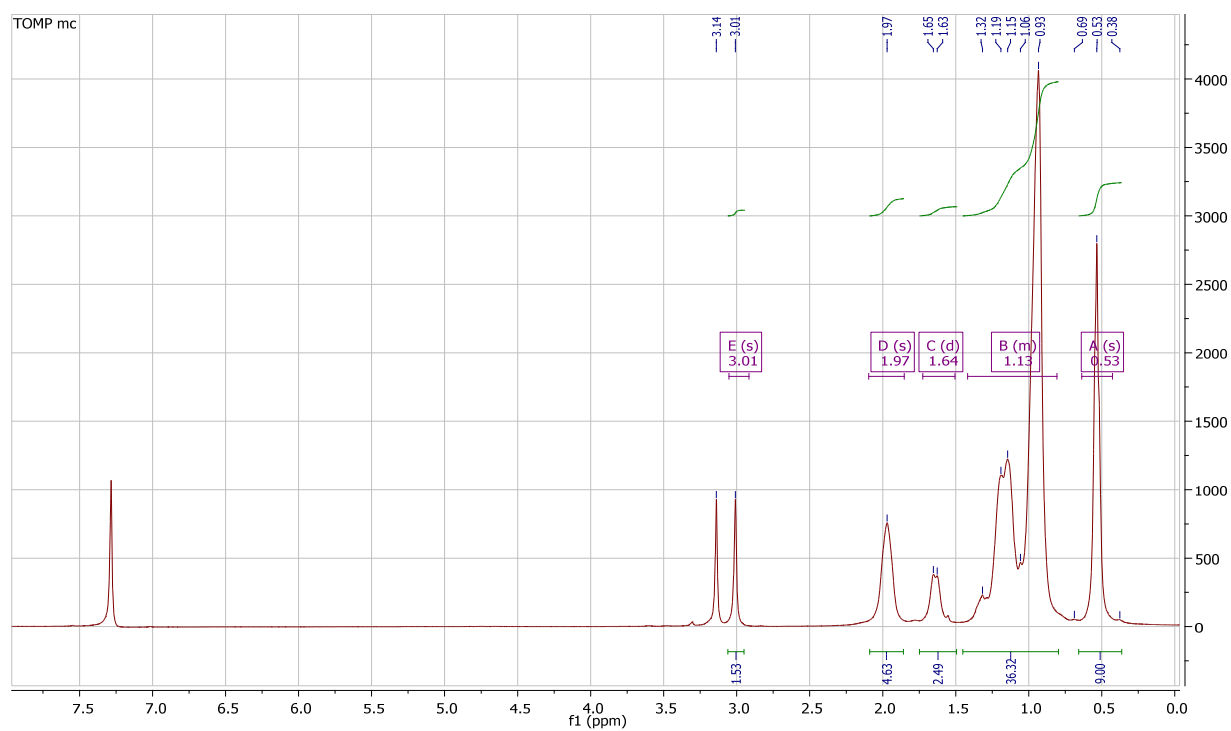

Figure S3.  $^1\text{H}$ -NMR (400MHz,  $\text{CDCl}_3$ ):  $\delta = 0.53$  (s, 9H), 0.93-1.32(m, 36H), 1.64 (d, 3H), 1.976 (s, 6H), 3.01 (s, 3H).

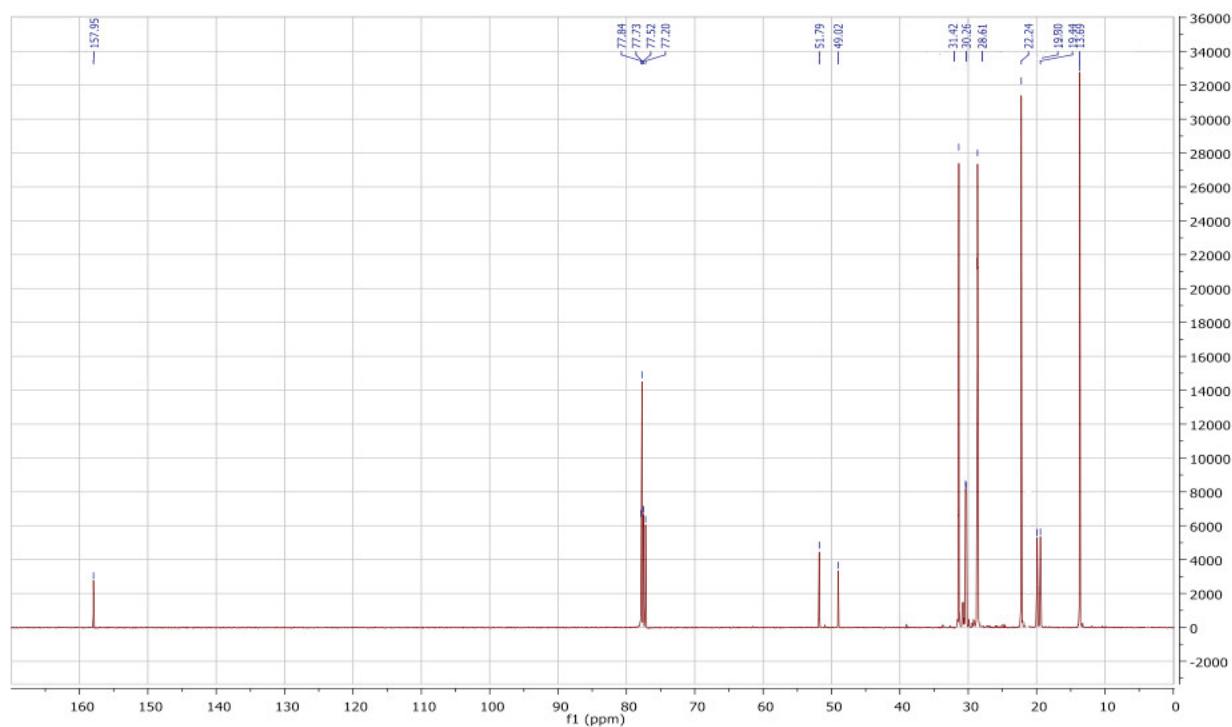

Figure S4.  $^{13}\text{C}$ -NMR (100MHz,  $\text{CDCl}_3$ ):  $\delta = 13.69, 19.44, 19.90, 22.24, 28.61, 30.26, 31.42, 49.02, 51.79, 77.84, 157.95$ .

*1.- Butyl-3-methylimidazolium–methyl carbonate / 1-butyl-3-methylimidazolium-2-carboxylate*

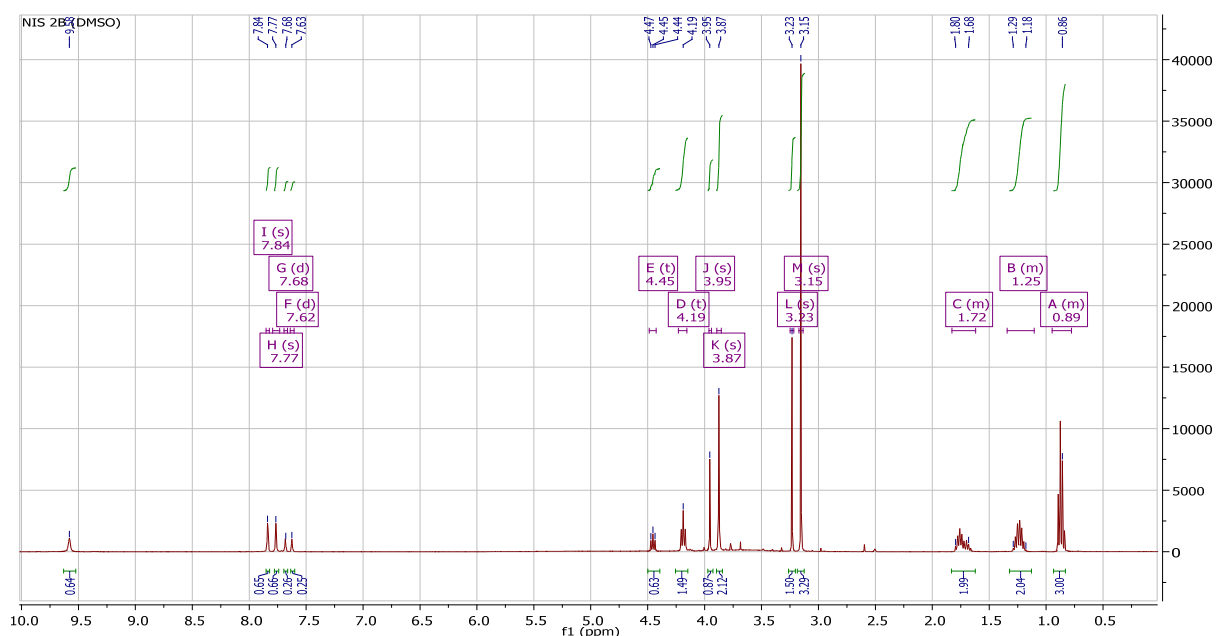

Figure S5.  $^1\text{H}$ -NMR (400MHz, DMSO) (1-Butyl-3-Methyl-2-Carboxy-Imidazolium):  $\delta = 0.89$  (m, 3H), 1.25 (m, 2H), 1.72 (m, 2H), 3.95 (s, 3H), 4.45 (t,  $J=7.3$ , 2H), 7.62 (d,  $J=1.68\text{Hz}$ , 1H), 7.68 (d,  $J=1.57\text{Hz}$ , 1H);  $^1\text{H}$ -NMR (400MHz, DMSO) (BMIM- $\text{CH}_3\text{OCOO}$ ):  $\delta = 0.88$  (t, 3H), 1.25 (m, 2H), 1.76 (m, 2H), 3.23 (s, 3H), 3.87 (s, 3H), 4.19 (t,  $J=7.2\text{Hz}$ , 2H), 7.77 (s, 1H), 7.84 (s, 1H), 9.58 (bs, 1H).

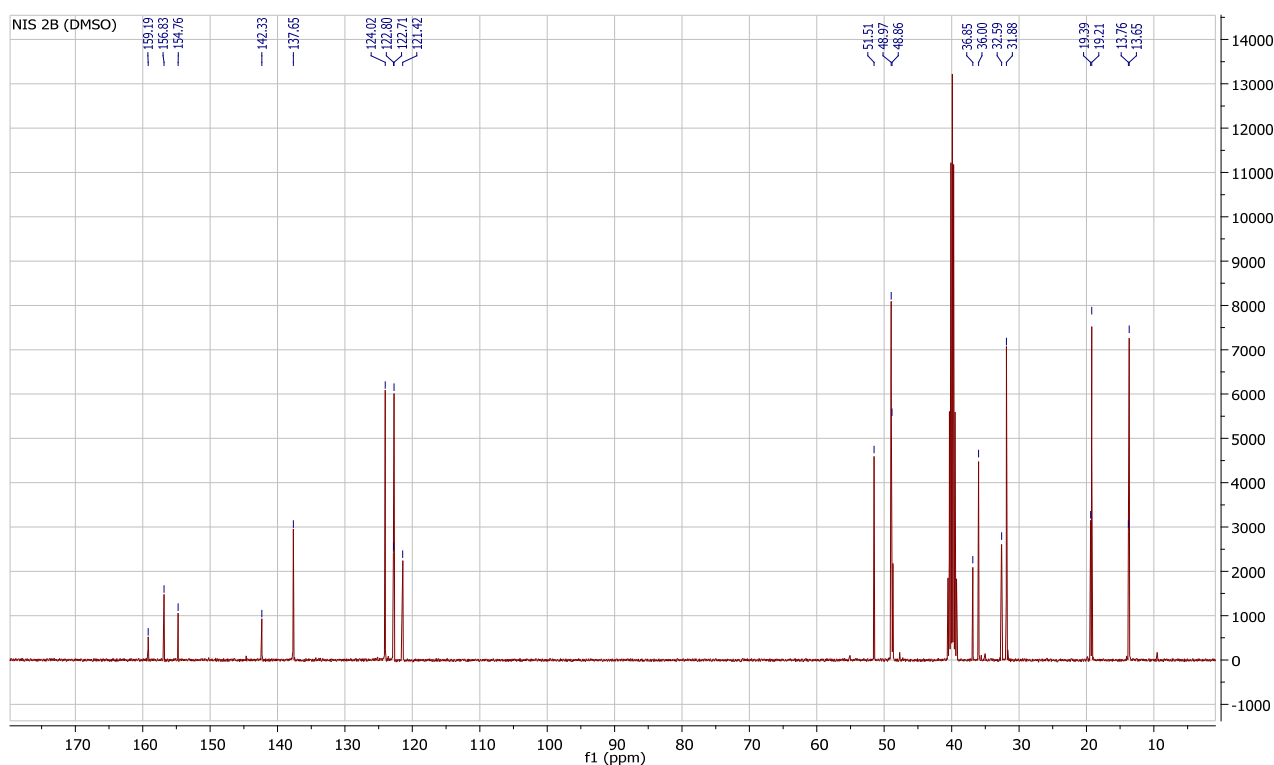

**Figure S6.**  $^{13}\text{C}$ -NMR (100MHz, DMSO) (1-Butyl-3-Methyl-2-Carboxy-Imidazolium):  $\delta = 13.76, 19.39, 32.59, 36.85, 48.97, 112.8, 121.42, 122.8, 159.19$ ;  $^{13}\text{C}$ -NMR (100MHz, DMSO) (BMIM- $\text{CH}_3\text{COO}$ ):  $\delta = 13.65, 19.21, 31.88, 36.00, 48.97, 51.51, 122.71, 124.02, 137.65, 156.83$ .

*Trioctylmethylammonium-tungstate ( $[\text{N}_{8,8,8,1}]_2(\text{WO}_4)_2, 1$ )*

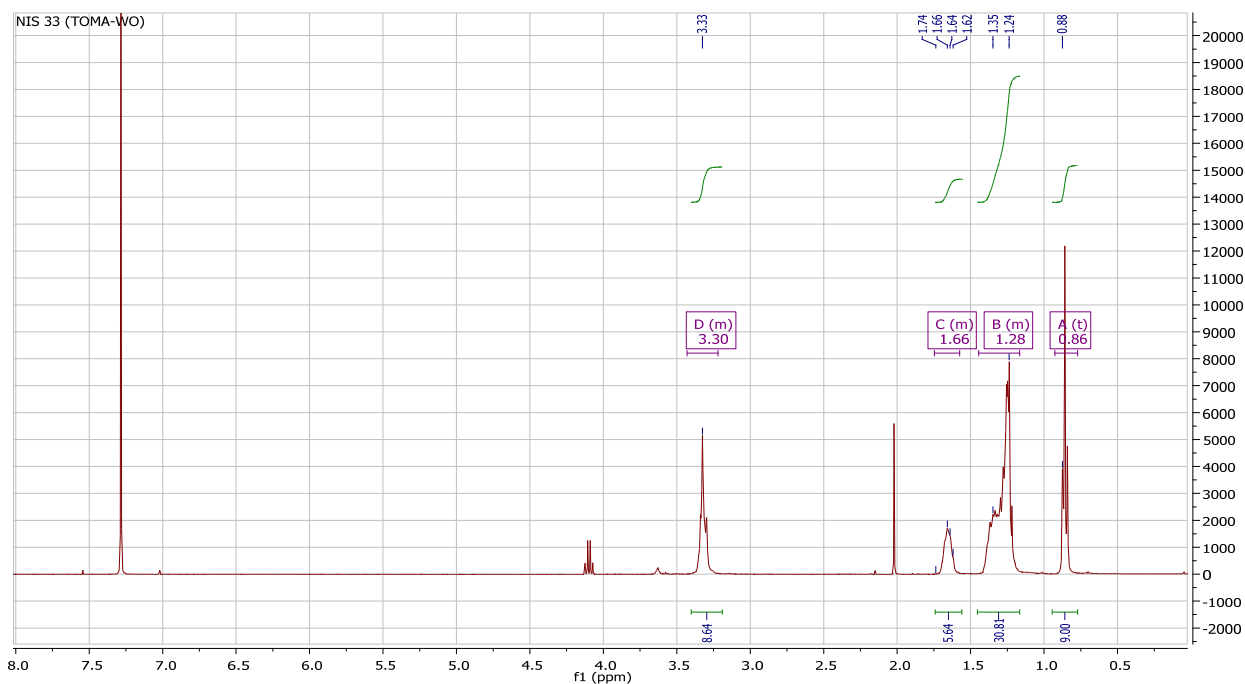

**Figure S7.**  $^1\text{H}$ -NMR (400MHz,  $\text{CDCl}_3$ ):  $\delta = 0.86$  (t,  $J=6.9\text{Hz}$ , 9H), 1.17-1.45 (m, 30H), 1.67 (m, 6H), 3.36(s, 3H), 3.38 (m, 6H).

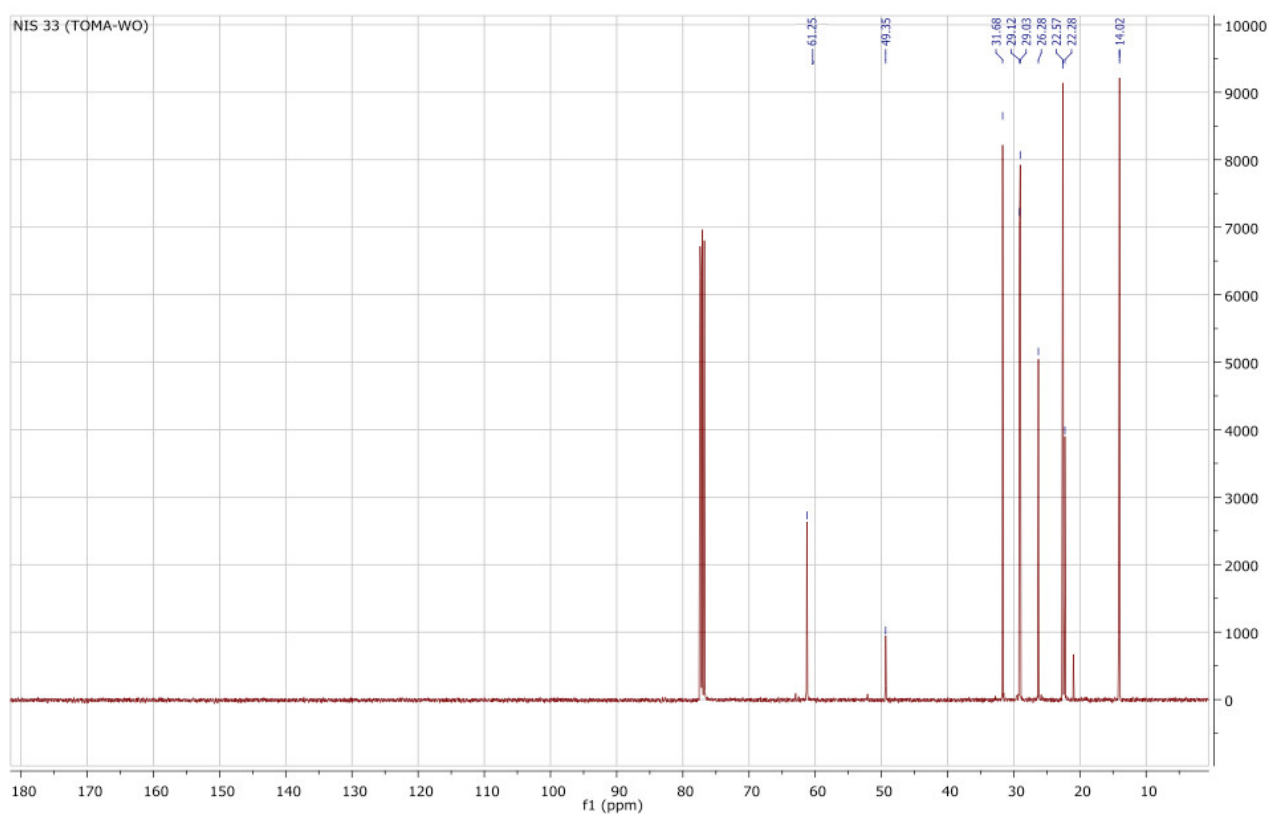

Figure S8.  $^{13}\text{C}$ -NMR (100MHz,  $\text{CDCl}_3$ ):  $\delta$  = 61.25, 49.35, 31.68, 29.12, 29.03, 26.28, 22.57, 22.28, 14.02.

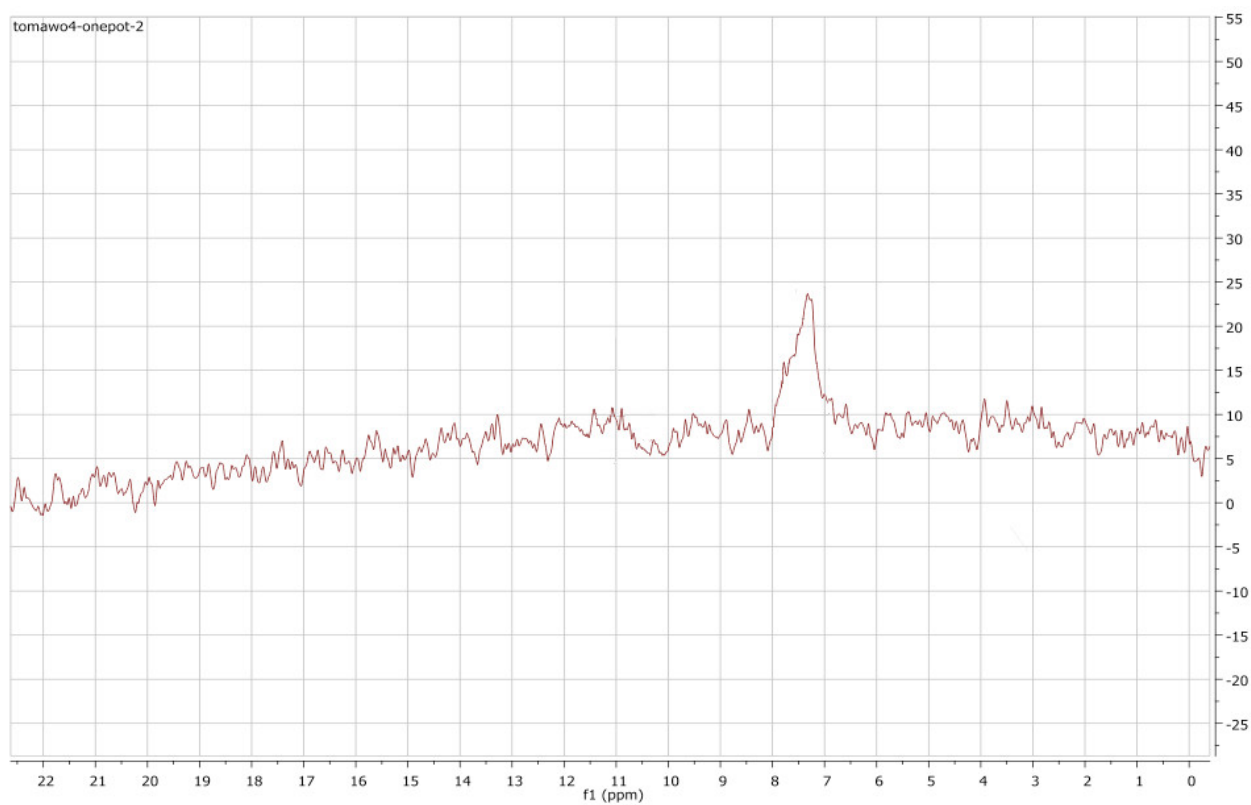

Figure S9.  $^{183}\text{W}$  NMR spectra of  $[\text{N}_{8,8,8,1}]_2\text{WO}_4$  in  $\text{D}_2\text{O}$ .

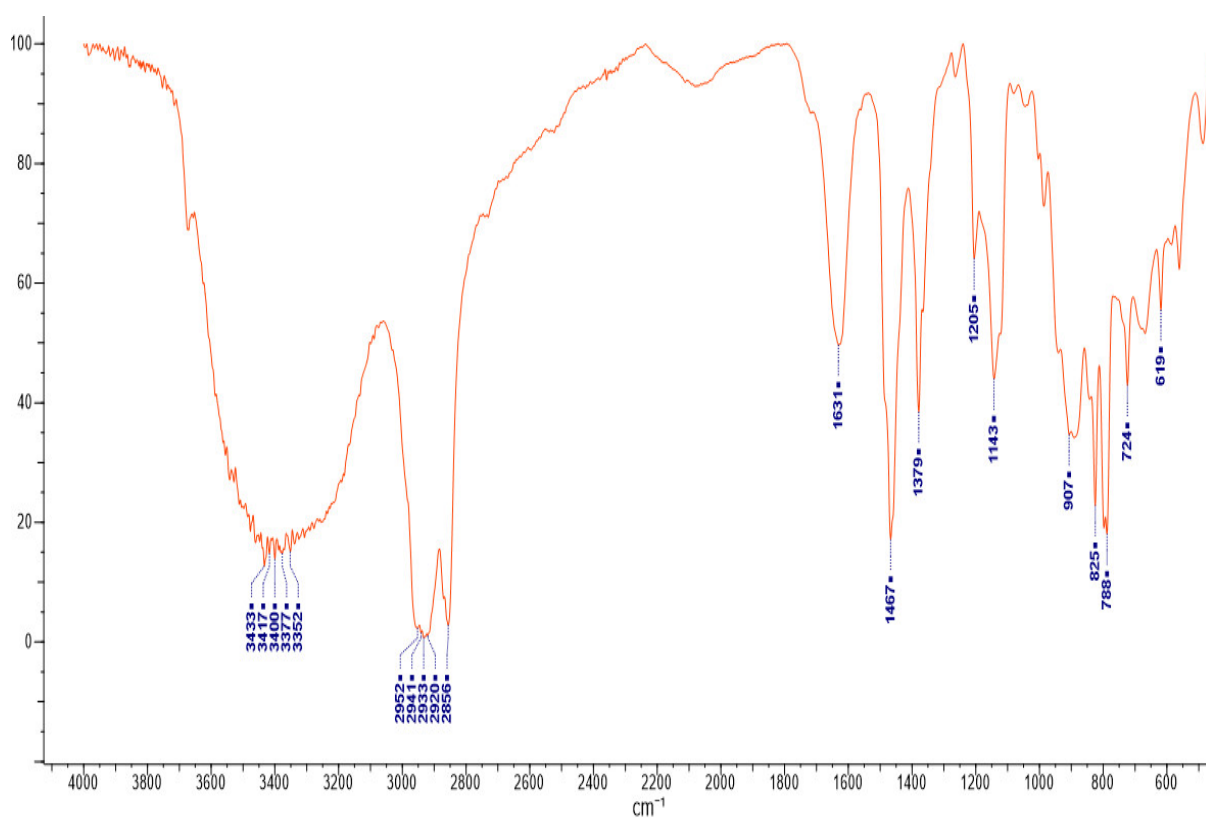

Figure S10. FT-IR spectra of  $[N_{8,8,1}]_2WO_4$  (KBr pellets).

*Trioctylmethylphosphonium-tungstate* ( $[P_{8,8,1}]_2(WO_4)_2$ )

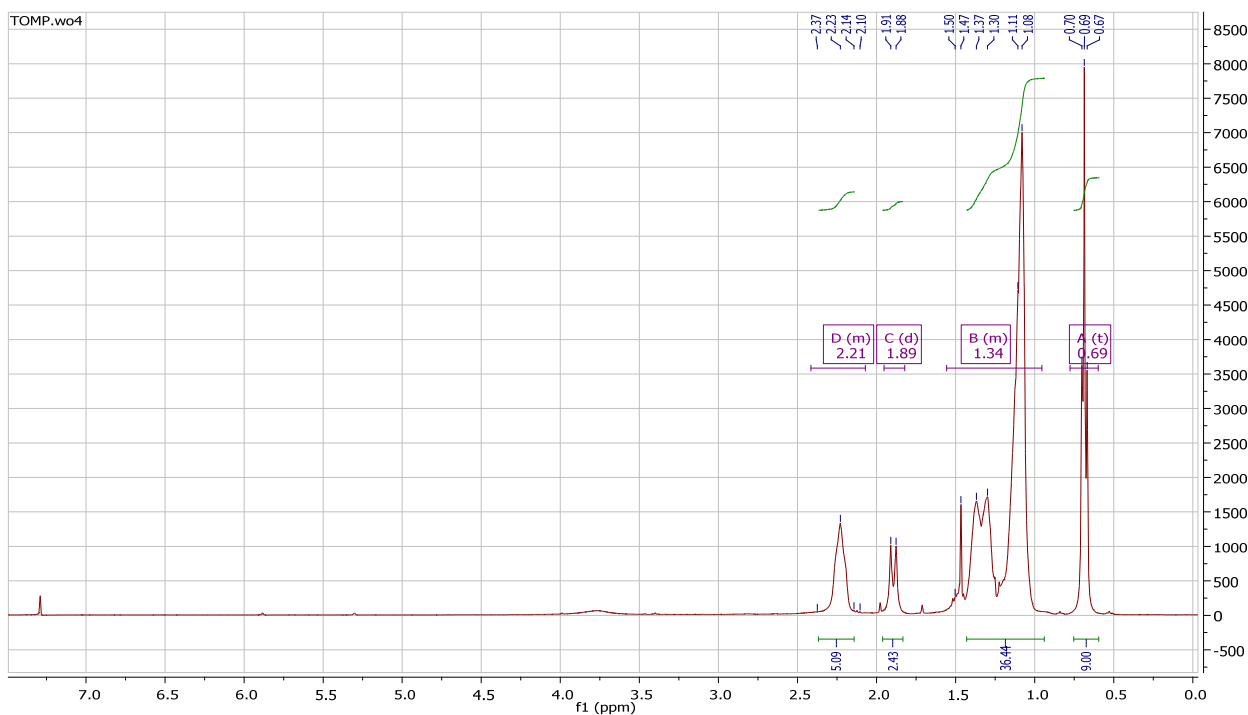

Figure S11.  $^1H$ -NMR (400MHz,  $CDCl_3$ ):  $\delta$  = 0.69 (t,  $J$ =6.7Hz, 9H), 1.00-1.50 (m, 36H), 1.85-1.95(d,  $J$ =13.3Hz, 3H), 2.21 (m, 6H).

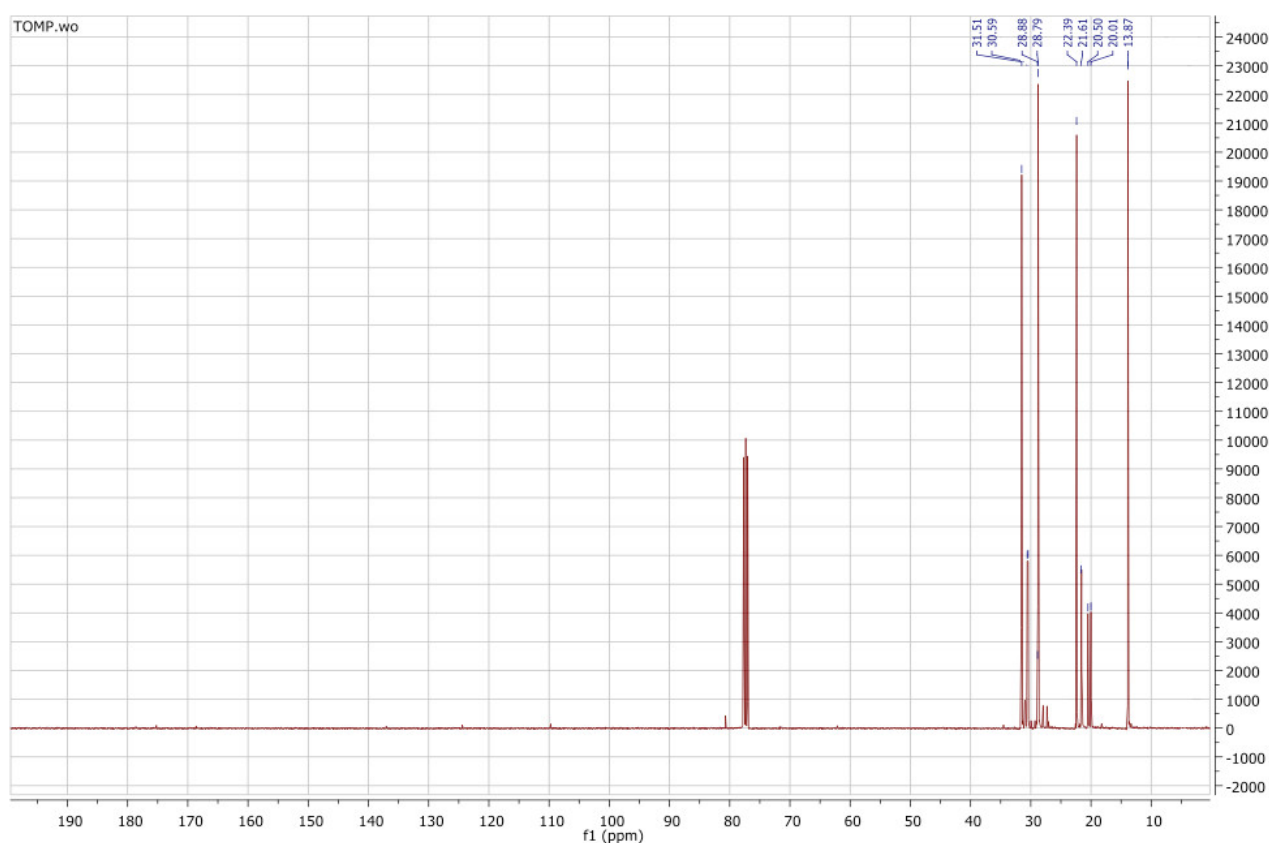

**Figure S12.** <sup>13</sup>C-NMR (100MHz, CDCl<sub>3</sub>):  $\delta$  = 13.87, 20.01, 20.50, 21.61, 22.39, 28.79, 28.88, 30.59, 31.51.

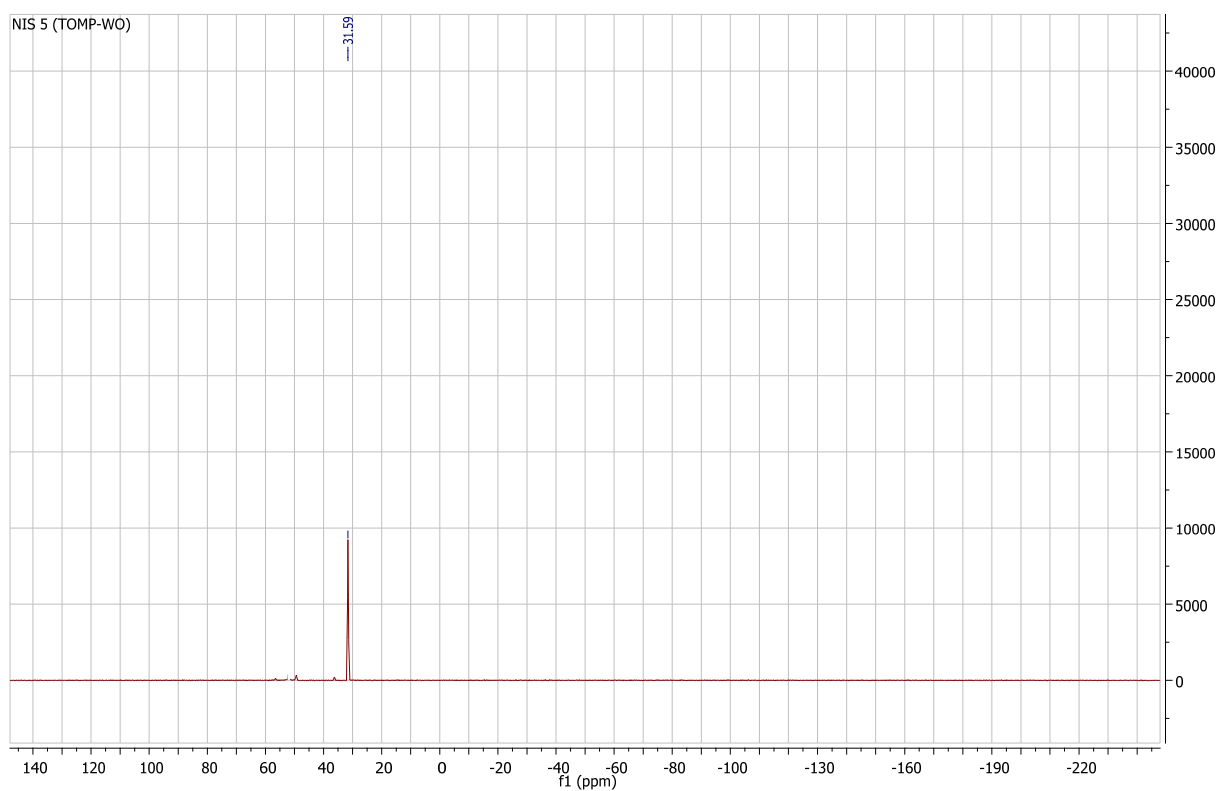

**Figure S13.** <sup>31</sup>P-NMR (162MHz, CDCl<sub>3</sub>):  $\delta$  = 31.53.

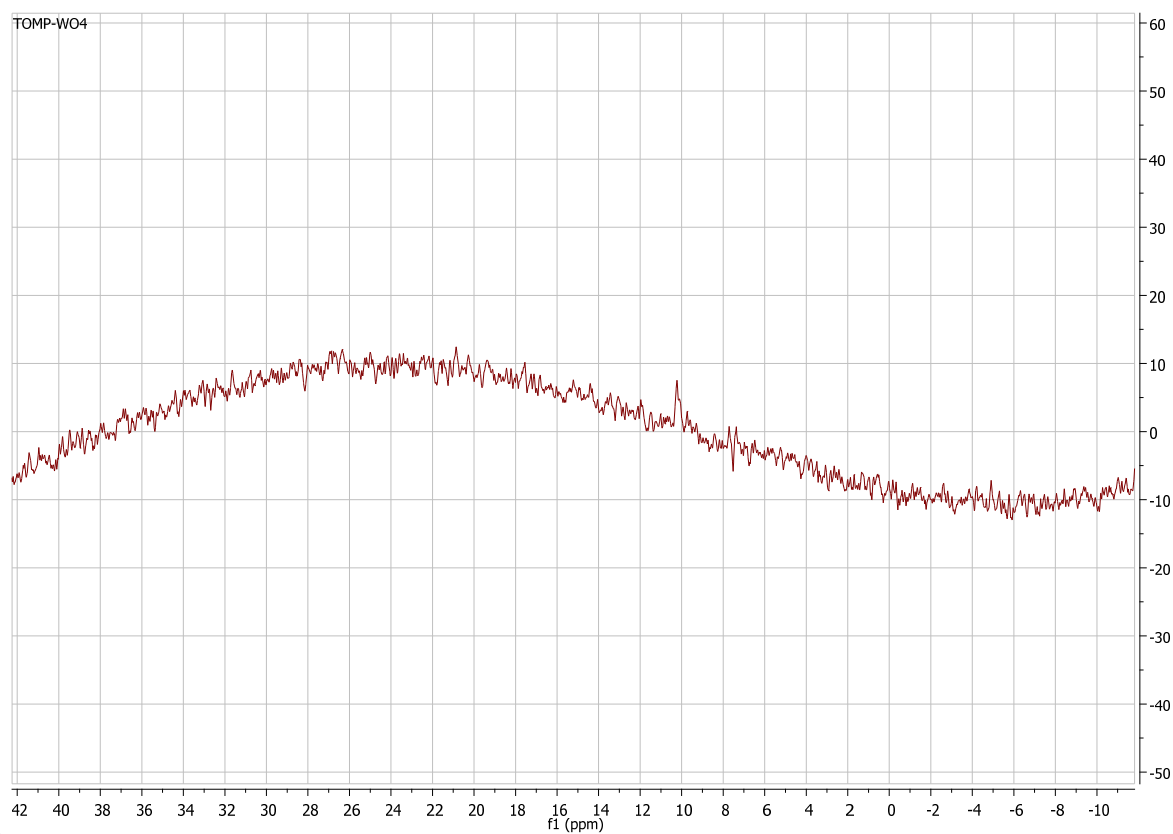

Figure S14.  $^{183}\text{W}$  NMR spectra of  $[\text{P}_{8,8,8,1}]_2\text{WO}_4$  in  $\text{D}_2\text{O}$ .

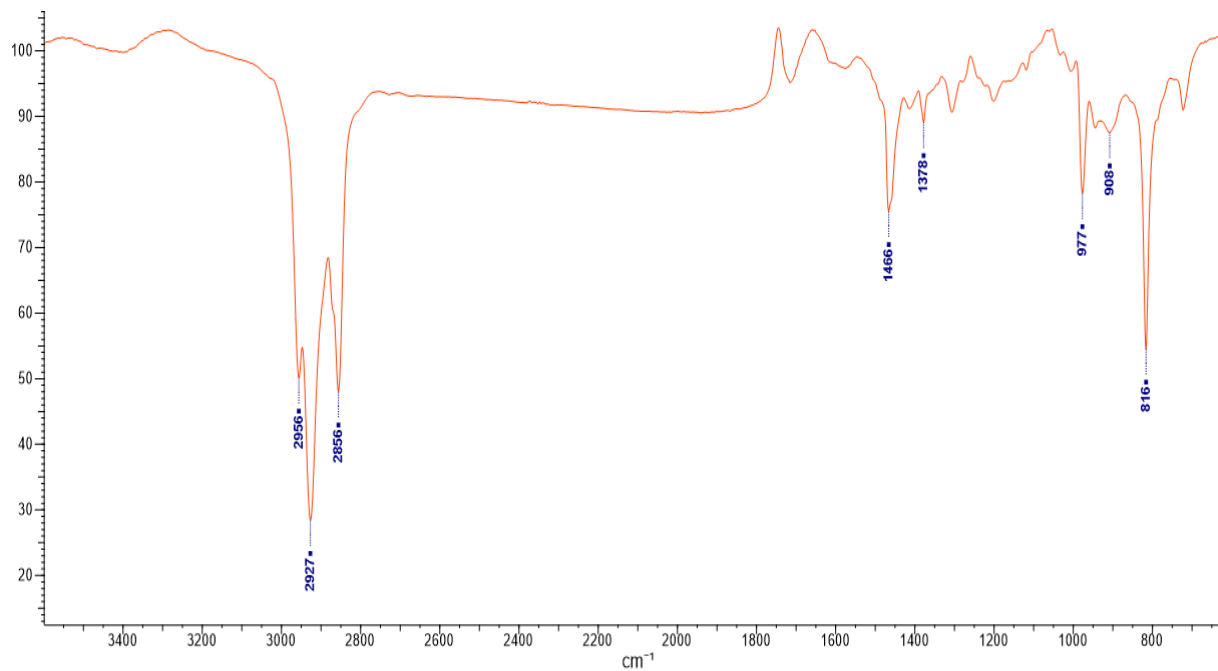

Figure S15. FT-IR spectra of  $[\text{P}_{8,8,8,1}]_2\text{WO}_4$  (KBr pellets).

*Trioctylmethylammonium-phosphotungstate ( $[\text{N}_{8,8,8,1}]_3(\text{PW}_{12}\text{O}_{40})$ , 3)*



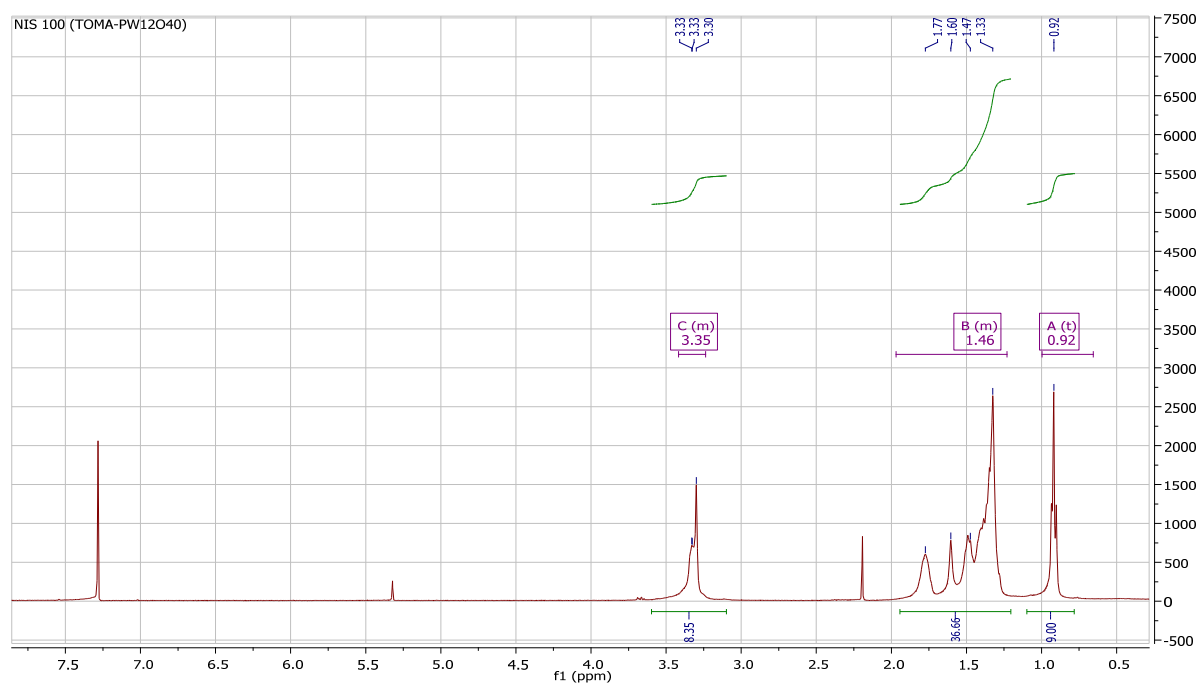

Figure S16.  $^1\text{H}$ -NMR (400MHz,  $\text{CDCl}_3$ ):  $\delta = 0.87$  (t, 9H), 1.25-1.72 (m, 36H), 3.37-3.75(m, 9H).

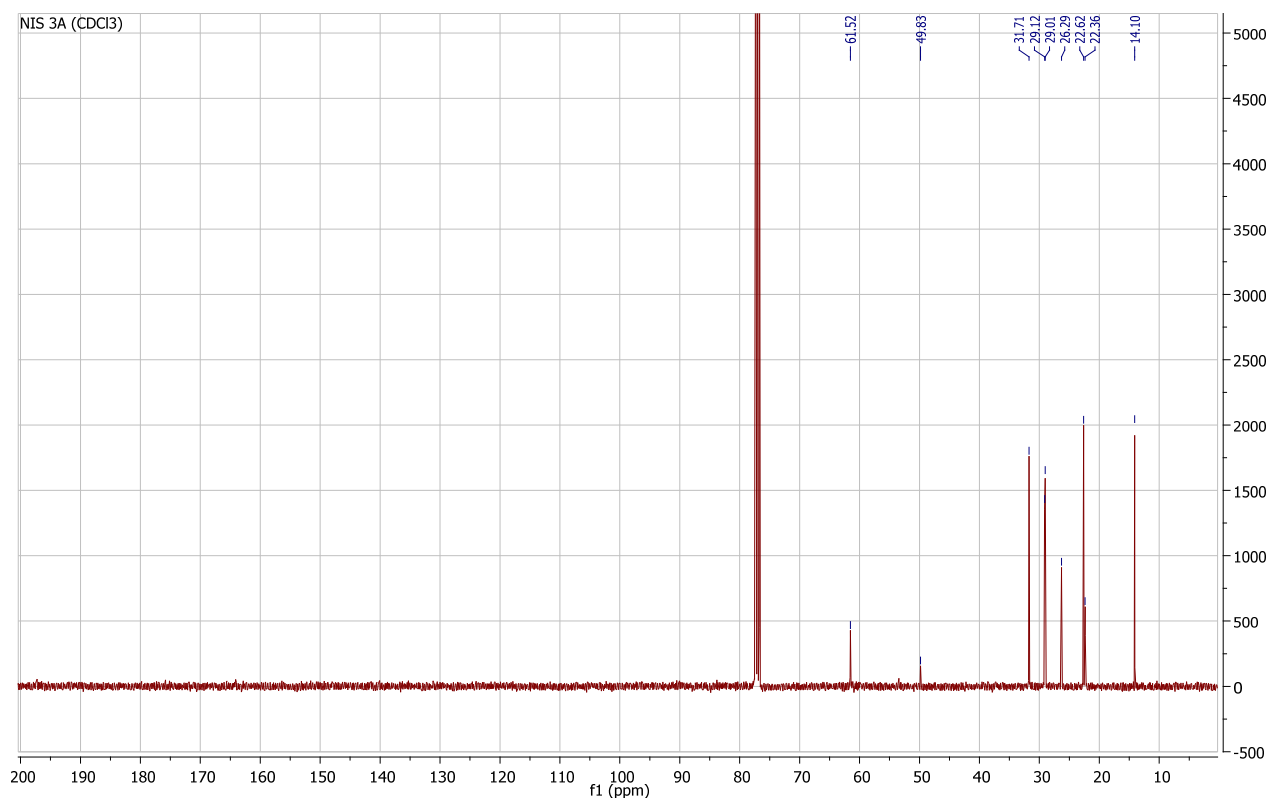

Figure S17.  $^{13}\text{C}$ -NMR (100MHz,  $\text{CDCl}_3$ ):  $\delta = 14.1$ , 22.36, 22.62, 26.29, 29.01, 29.12, 31.71, 49.83, 61.52.

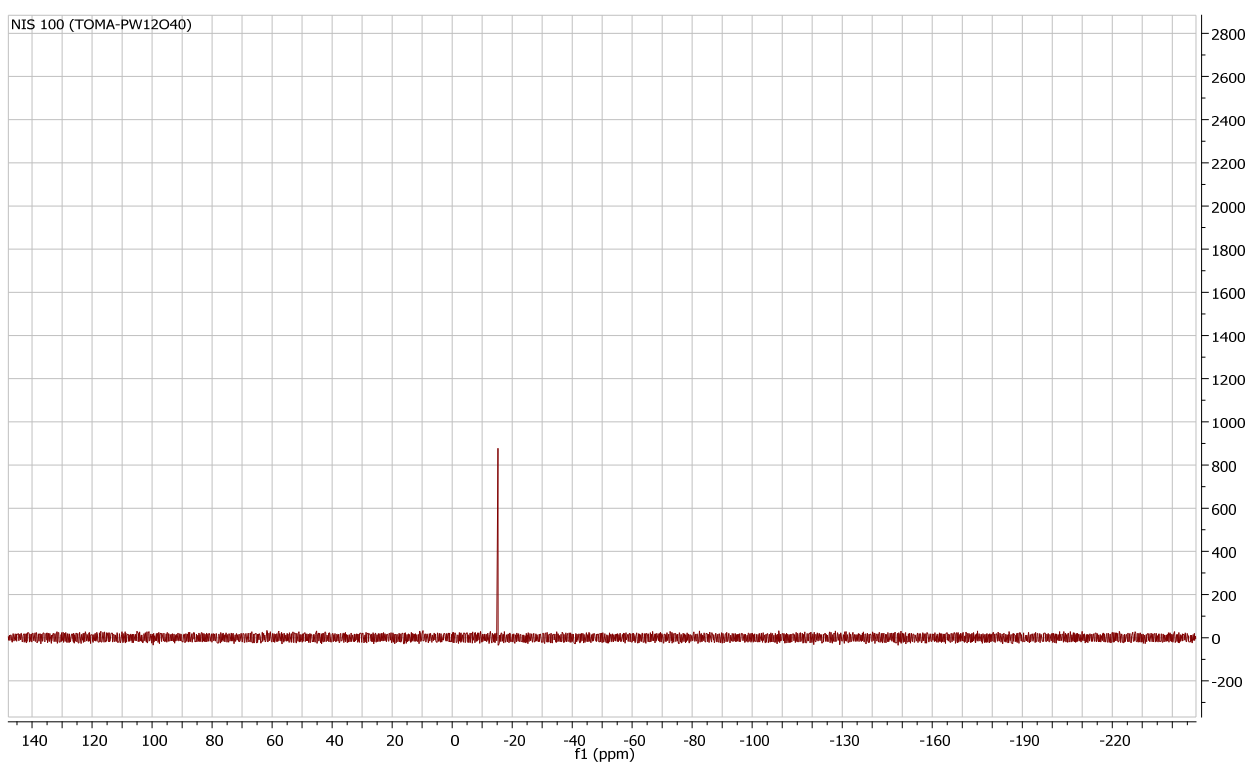

Figure S18.  $^{31}\text{P}$ -NMR (162MHz,  $\text{CDCl}_3$ ):  $\delta = -15.29$ .

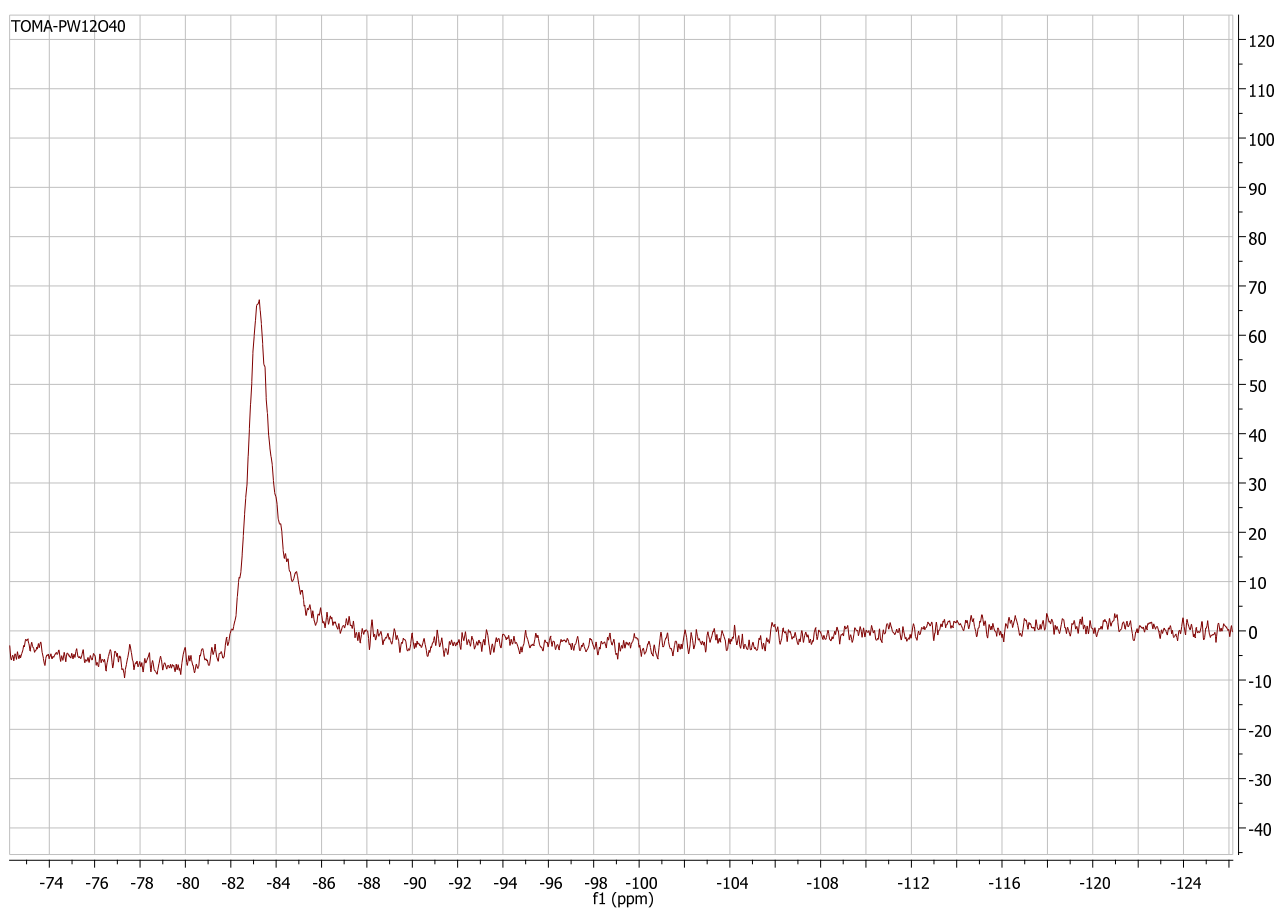

Figure S19.  $^{183}\text{W}$  NMR spectra of  $([\text{N}_{8,8,8,1}]_3(\text{PW}_{12}\text{O}_{40}))$ .

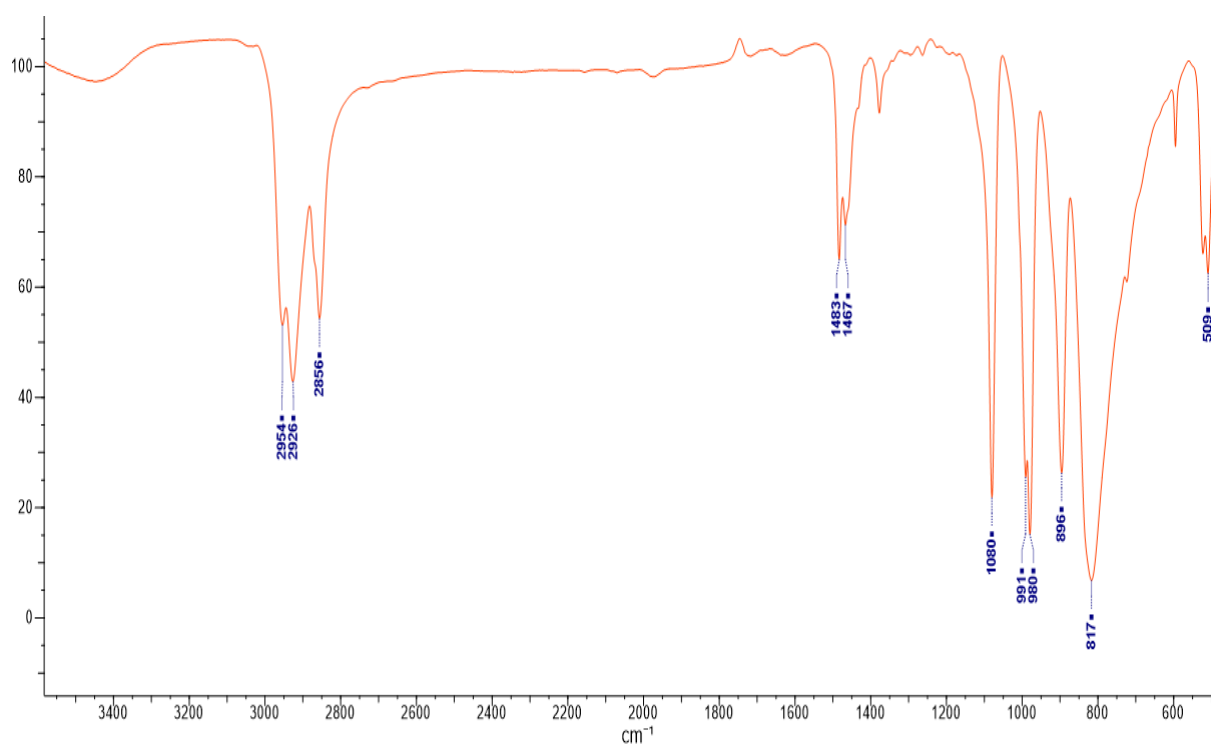

**Figure S20.** FT-IR spectra of  $[\text{N}_{8,8,8,1}]_3(\text{PW}_{12}\text{O}_{40})$  (KBr pellets).

*1.-. butyl-3-methyl-ammonium tungstate ( $[\text{BMIM}]_2(\text{WO}_4)$ , 4)*

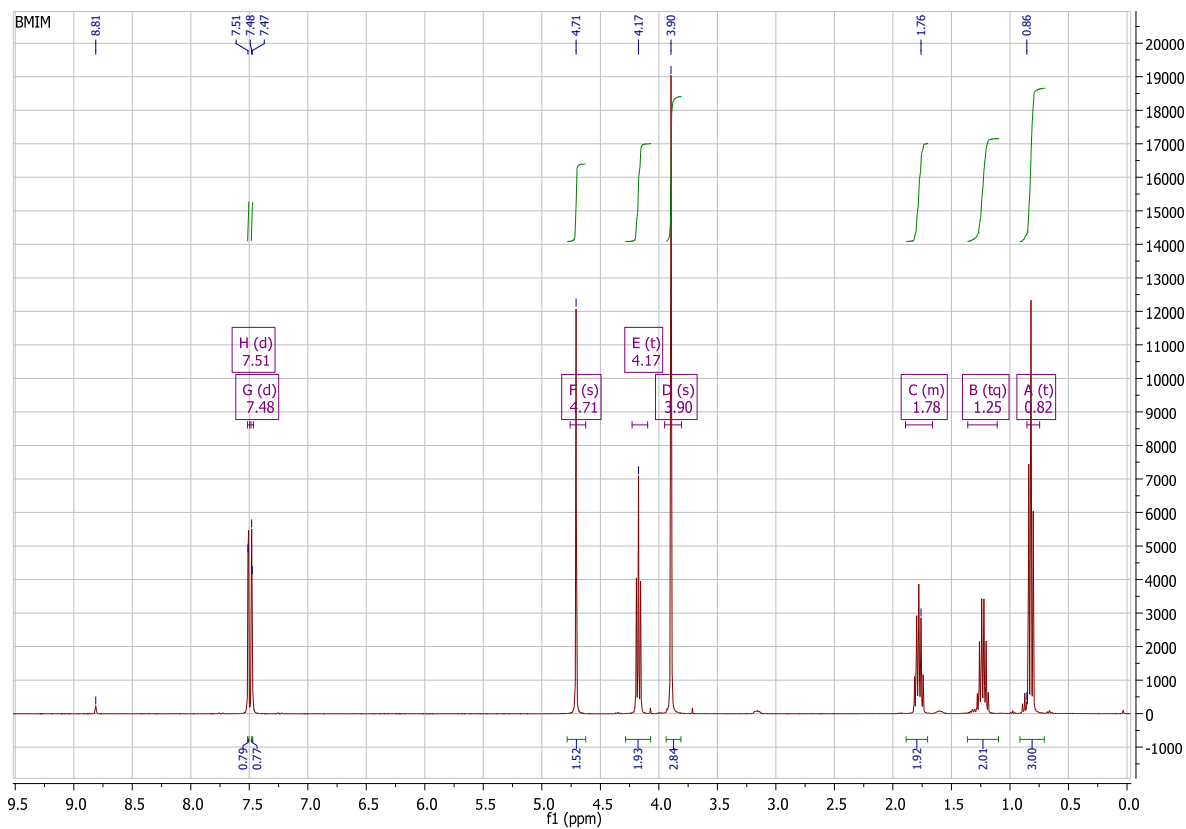

**Figure S21.**  $^1\text{H}$ -NMR (400MHz,  $\text{D}_2\text{O}$ ):  $\delta = 0.82$  (t,  $J=7.4\text{Hz}$ , 3H), 1.18-1.29 (tq,  $J=14.8, 7.3\text{Hz}$ , 2H), 1.74-1.81(m, 2H), 3.90 (s, 3H), 4.17 (t,  $J=7.2\text{Hz}$ , 2H), 4.71 (s, 1H), 7.48 (d,  $J=2.0\text{Hz}$ , 1H), 7.51 (d,  $J=2.0\text{Hz}$ , 1H), 8.81 (bs, 1H).

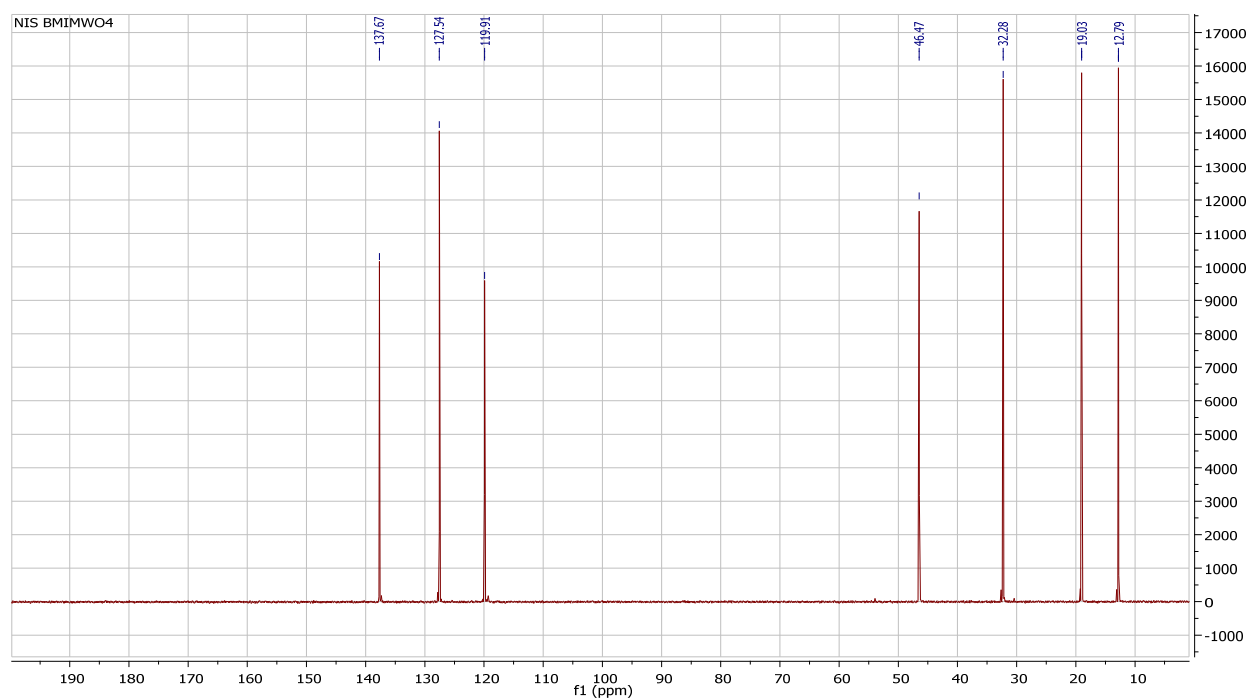

Figure S22. C-NMR (100MHz, D<sub>2</sub>O):  $\delta$  = 12.79, 19.03, 32.28, 46.47, 119.91, 127.54, 137.67.

13

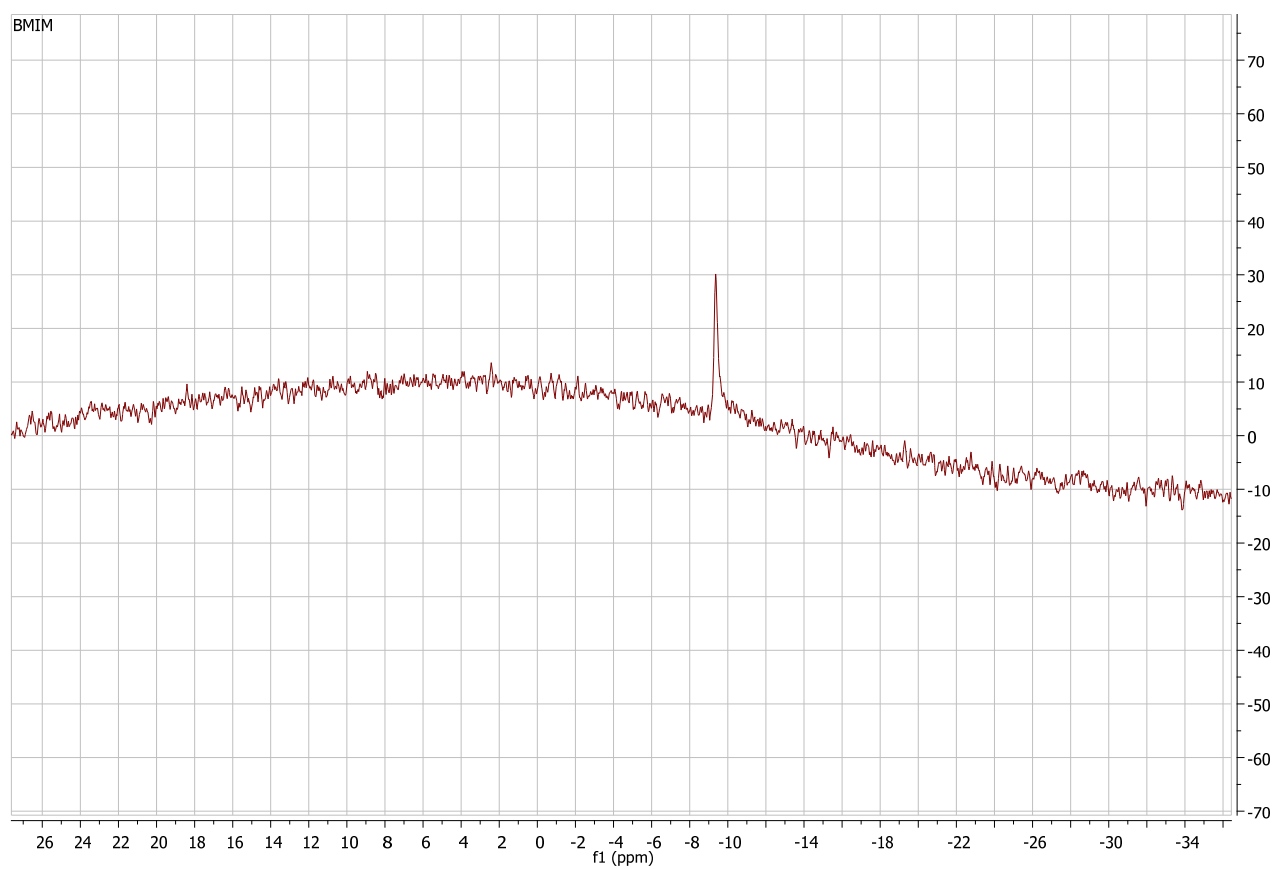

Figure S23.  $^{183}\text{W}$  NMR spectra of [BMIM]<sub>2</sub>(WO<sub>4</sub>) in D<sub>2</sub>O.

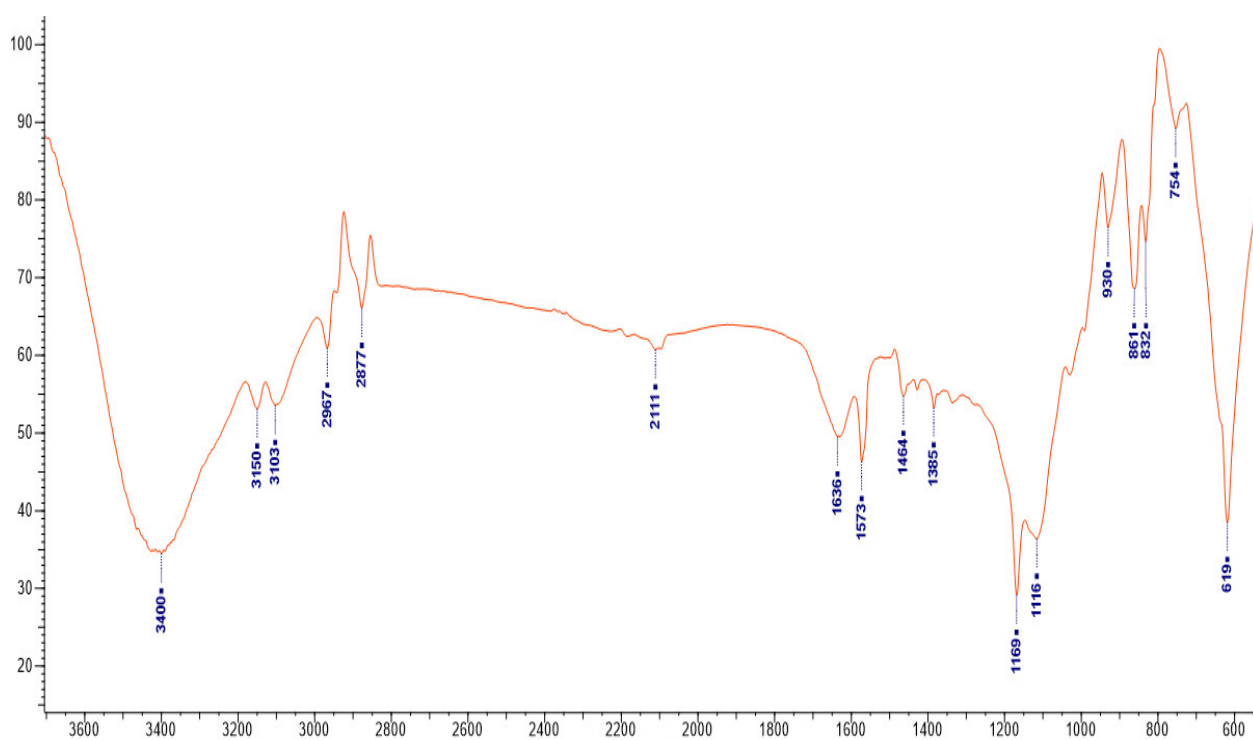

Figure S24. FT-IR spectra of [BMIM]<sub>2</sub>(WO<sub>4</sub>) (KBr pellets).

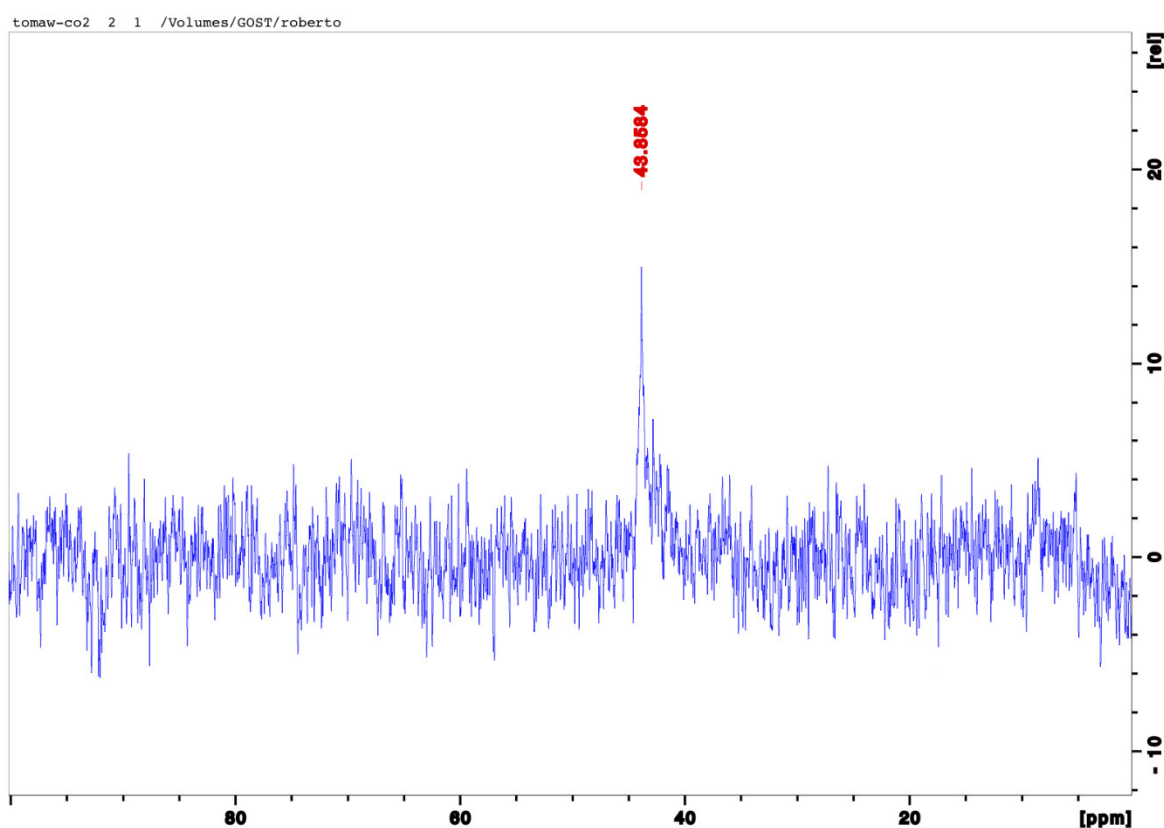

Figure S25. <sup>183</sup>W NMR spectra of the adduct WO<sub>4</sub>-CO<sub>2</sub>. A NMR tube was charged with [N<sub>8,8,8,1</sub>]<sub>2</sub>WO<sub>4</sub> (0.2 g), D<sub>2</sub>O (0.4 ml) and placed in an autoclave that was sealed, degassed via two vacuum-CO<sub>2</sub> cycles and pressurized with 10 bar of CO<sub>2</sub>. The mixture was placed at 85°C for 5 hours, then the autoclave was slowly vented and the NMR spectra was recorded.

## Products Characterization

## Methyl Oleate (MO)

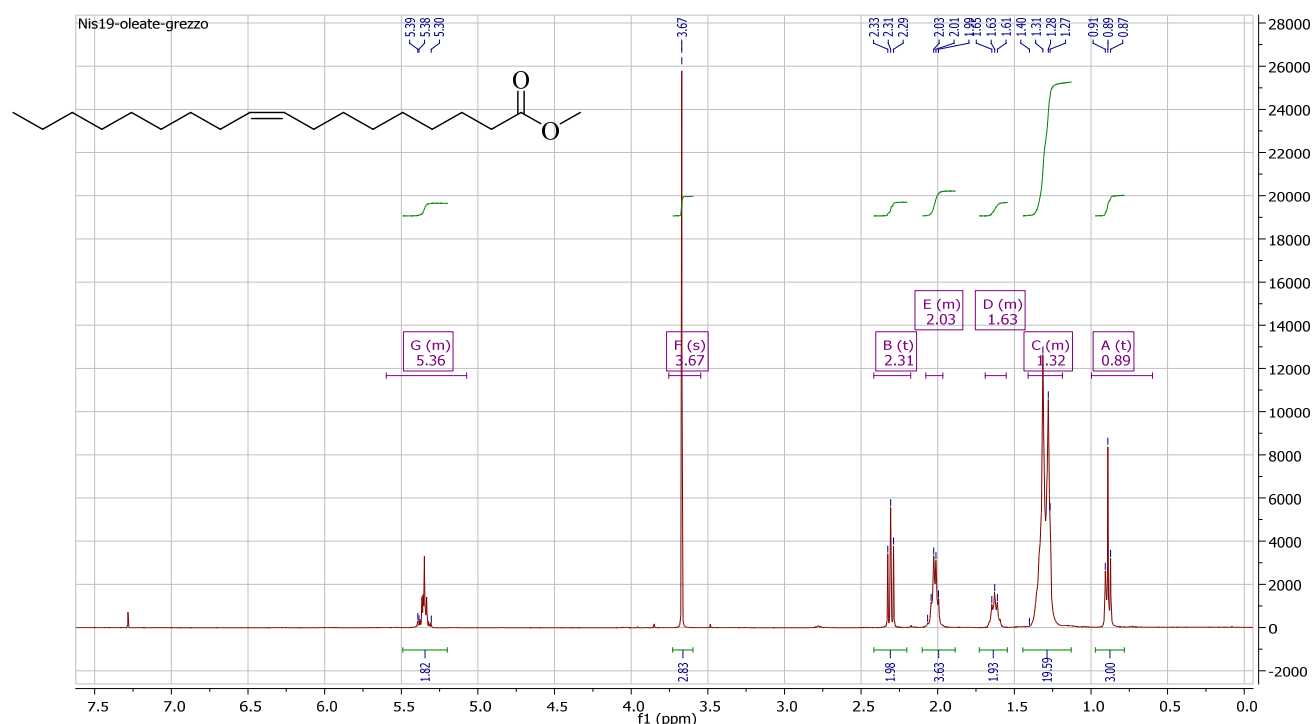

**Figure S26.** <sup>1</sup>H-NMR (400MHz, CDCl<sub>3</sub>):  $\delta$  = 0.89 (t, J=6.9Hz, 3H), 1.25-1.40 (m, 20H), 1.63 (m, 2H), 2.03 (m, 4H), 2.31 (t, J=7.6Hz, 2H), 3.67 (s, 3H), 5.30-5.39 (m, 2H).

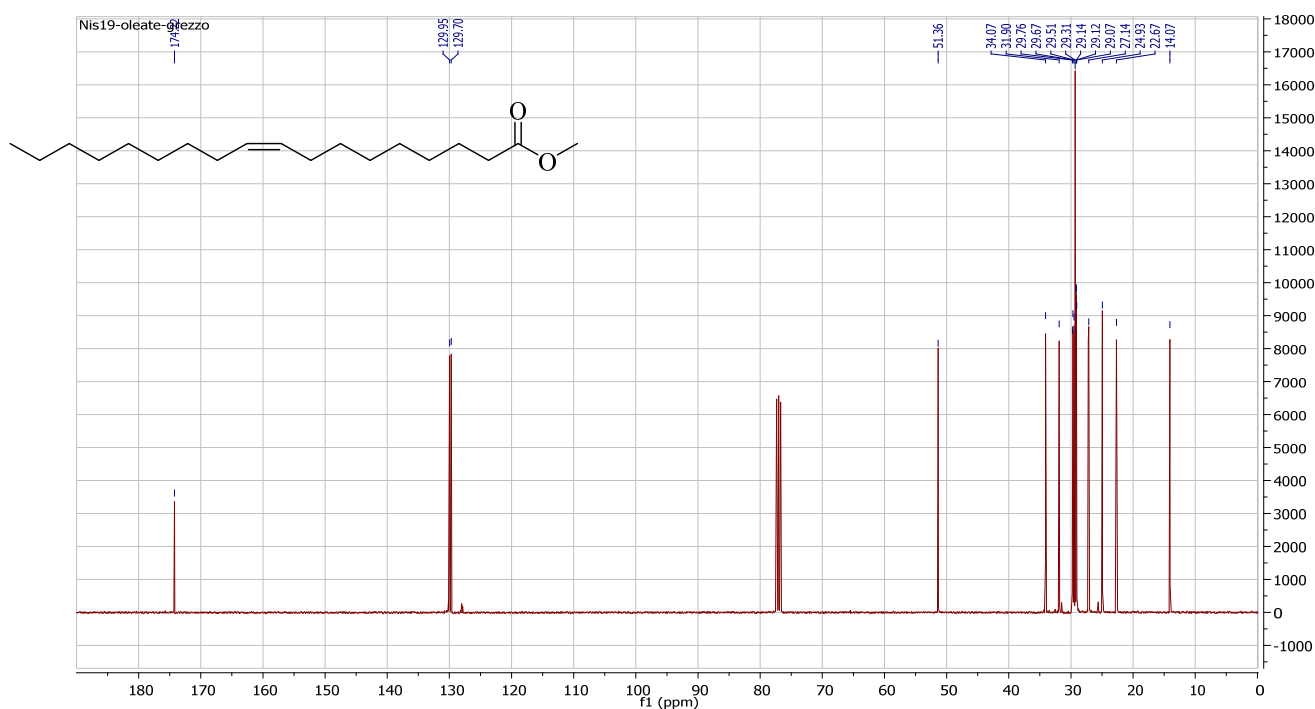

**Figure S27.** <sup>13</sup>C-NMR (100MHz, CDCl<sub>3</sub>):  $\delta$  = 14.07, 22.67, 24.93, 27.14, 27.20, 29.07, 29.12, 29.14, 29.31, 29.51, 29.67, 29.76, 31.90, 34.07, 51.36, 129.70, 129.95, 174.42.

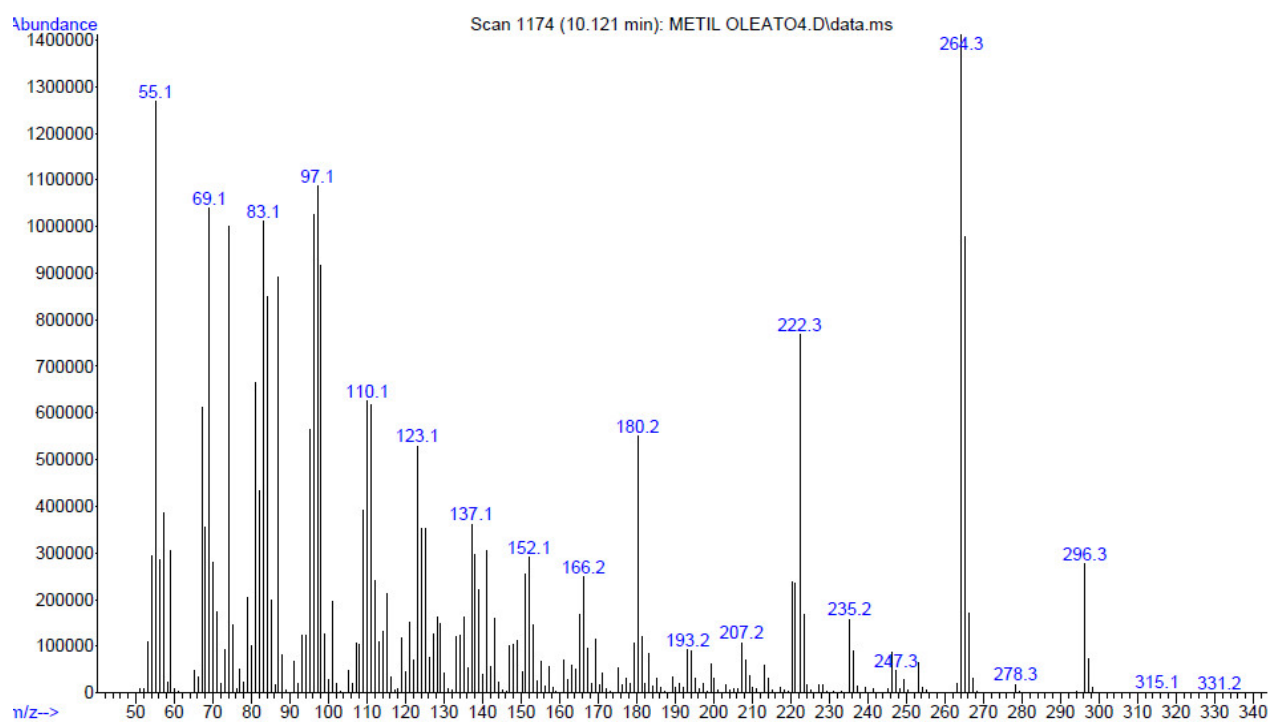

Figure S28. MS spectra of methyl oleate.

*Methyl 8-((2R,3S)-3-octyloxiran-2-yl) octanoate – Epoxidized methyl oleate (EMO)*

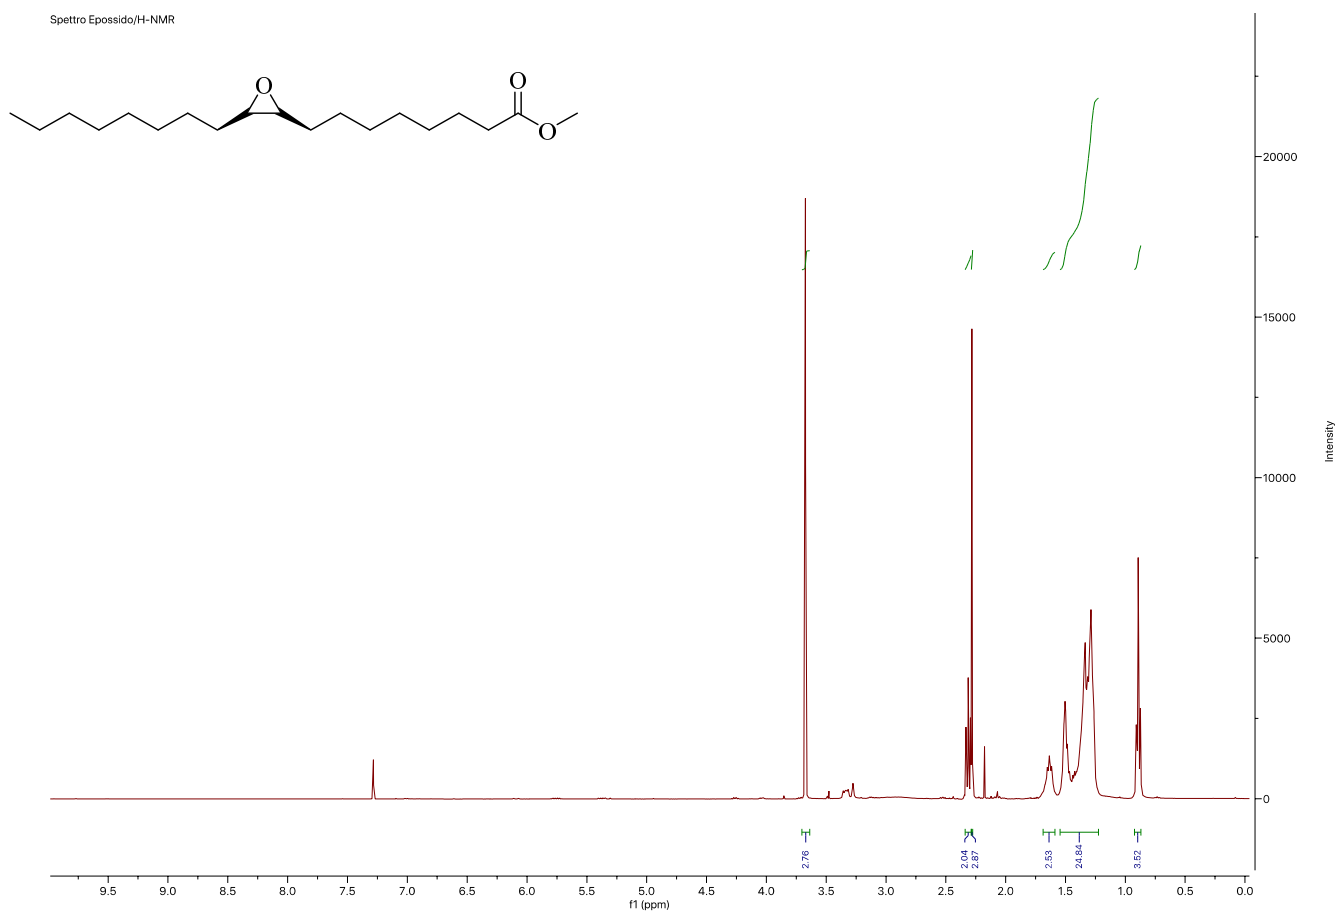

Figure S29.  $^1\text{H-NMR}$  (400MHz,  $\text{CDCl}_3$ ):  $\delta$  = 3.75 – 3.49 (s, 3H), 2.35 – 2.29 (m, 2H), 2.30 – 2.25 (m, 2H), 1.72 – 1.55 (m, 2H), 1.54 – 1.18 (m, 24H), 0.94 – 0.81 (m, 3H).

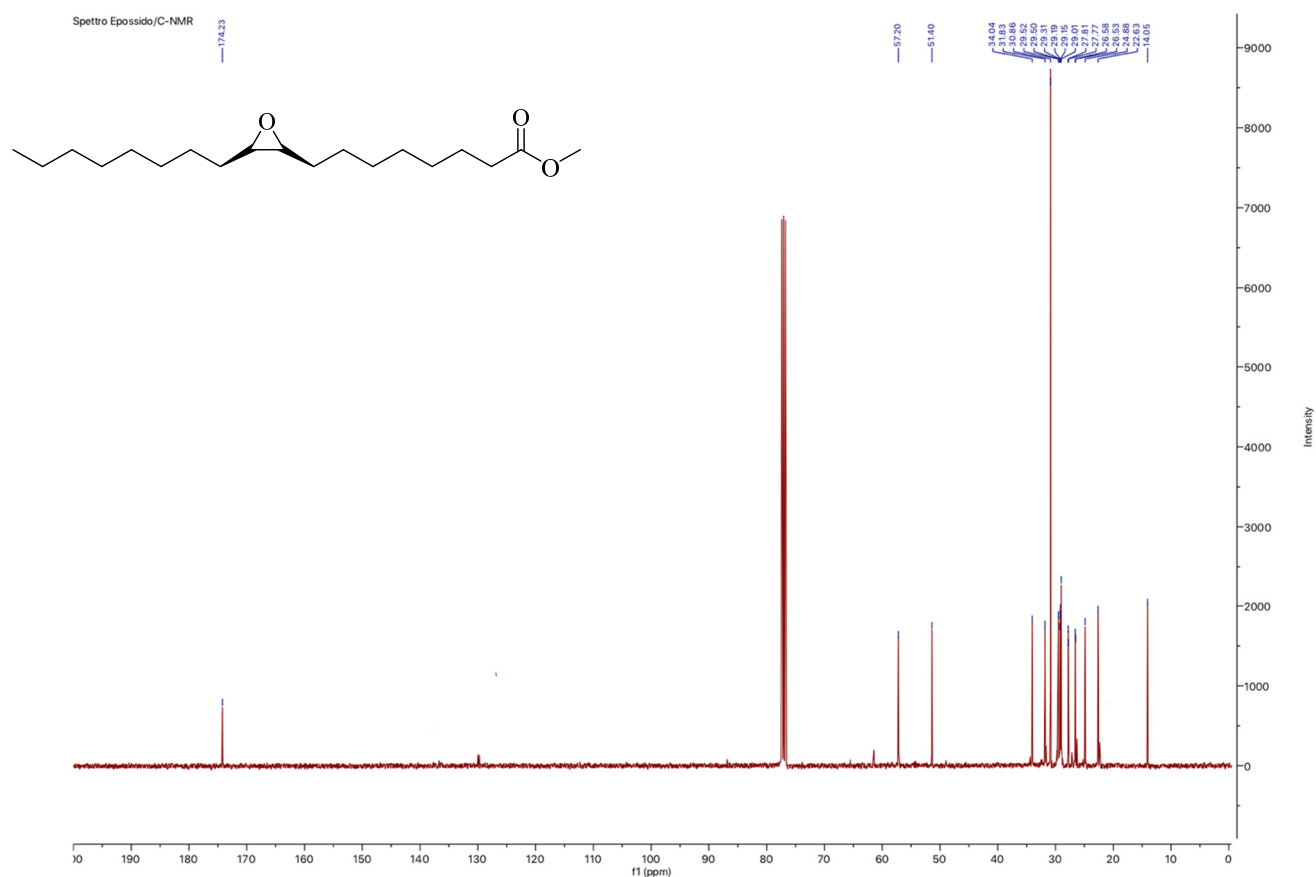

**Figure S30.**  $^{13}\text{C}$ -NMR (100MHz,  $\text{CDCl}_3$ ):  $\delta = 174.23, 57.20, 51.40, 34.04, 31.83, 30.86, 29.52, 29.50, 29.31, 29.19, 29.15, 29.01, 27.81, 27.77, 26.58, 26.53, 24.88, 22.63, 14.05$ .

*Cis-methyl 8-(5-octyl-2-oxo-1,3-dioxolan-4-yl) octanoate – cis carbonated methyl oleate (-cis CMO)*



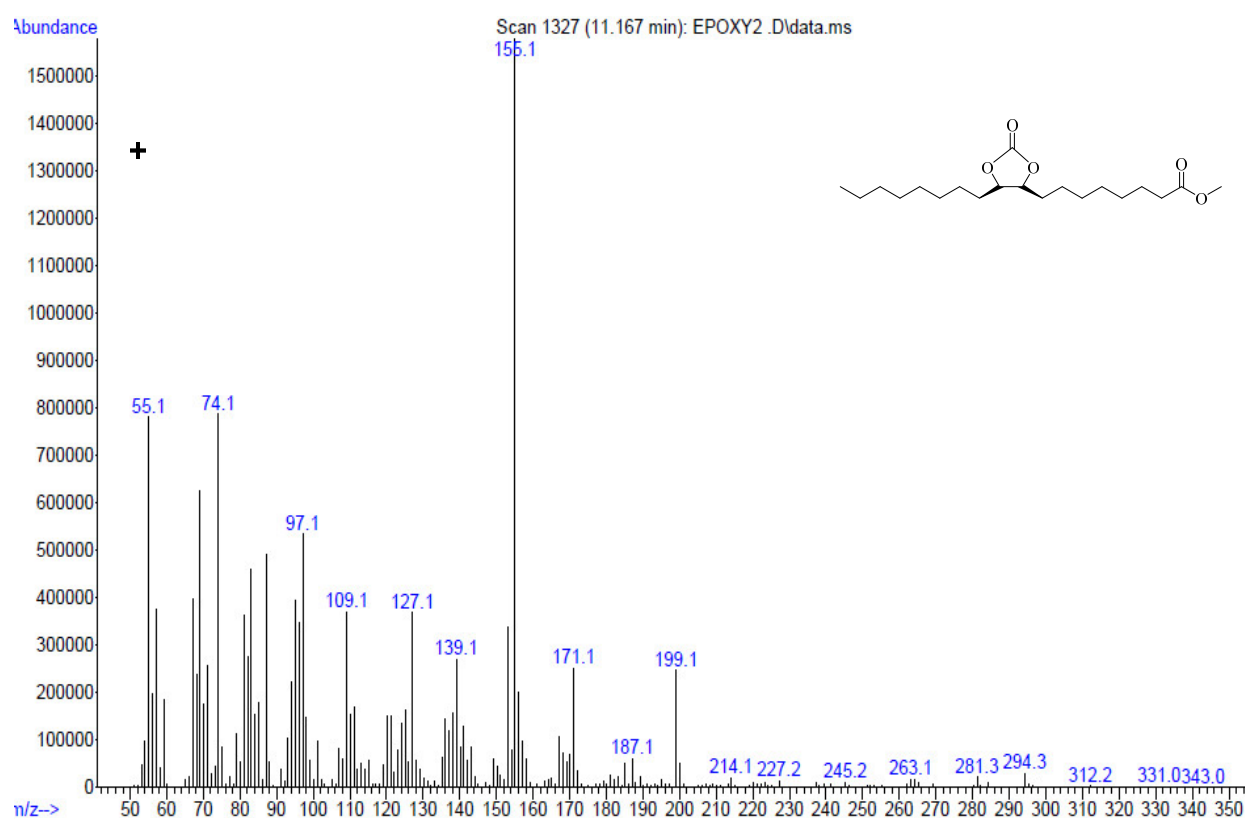

Figure S31. MS spectra of Epoxidized Methyl Oleate (EMO).

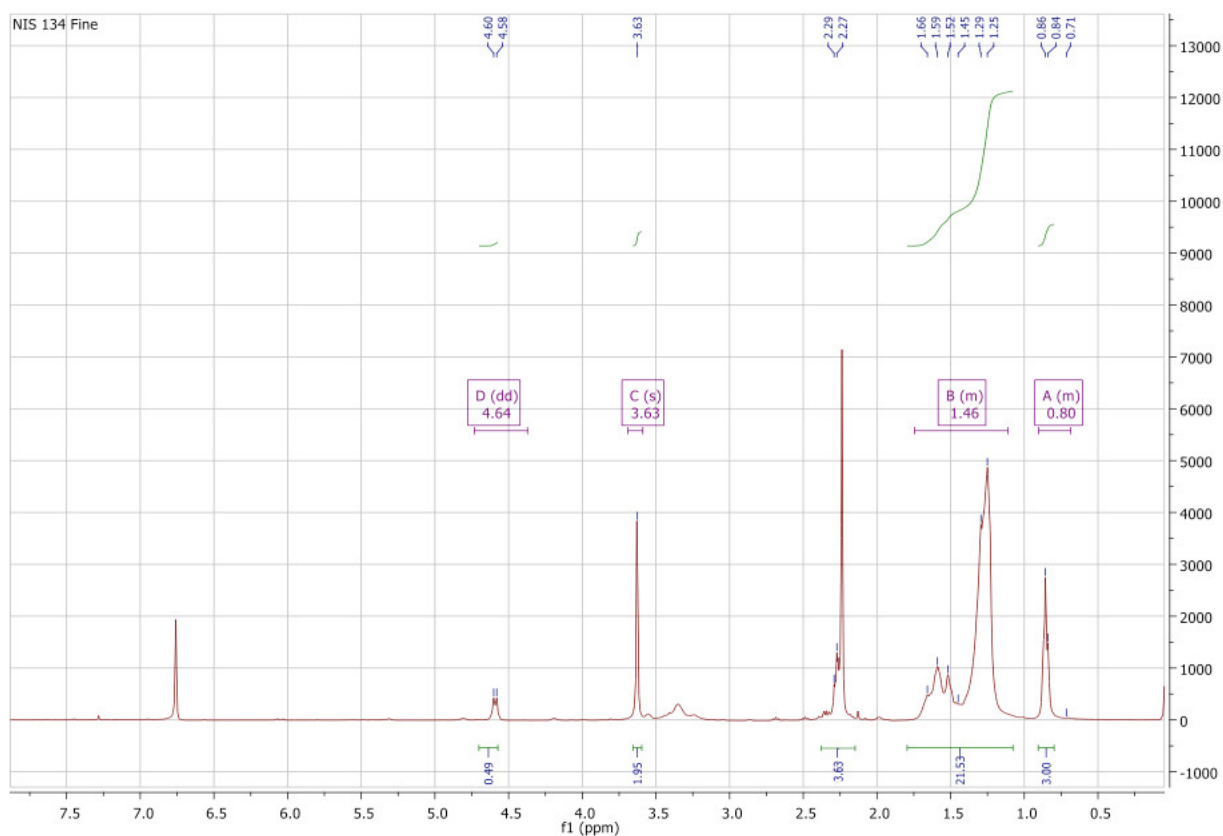Figure S32.  $^1\text{H}$ -NMR (400MHz,  $\text{CDCl}_3$ ):  $\delta$  = 0.80 (m, 3H), 1.25-1.66 (m, 24H), 2.27 (m, 4H), 3.63 (s, 3H), 4.64 (m, 2H).

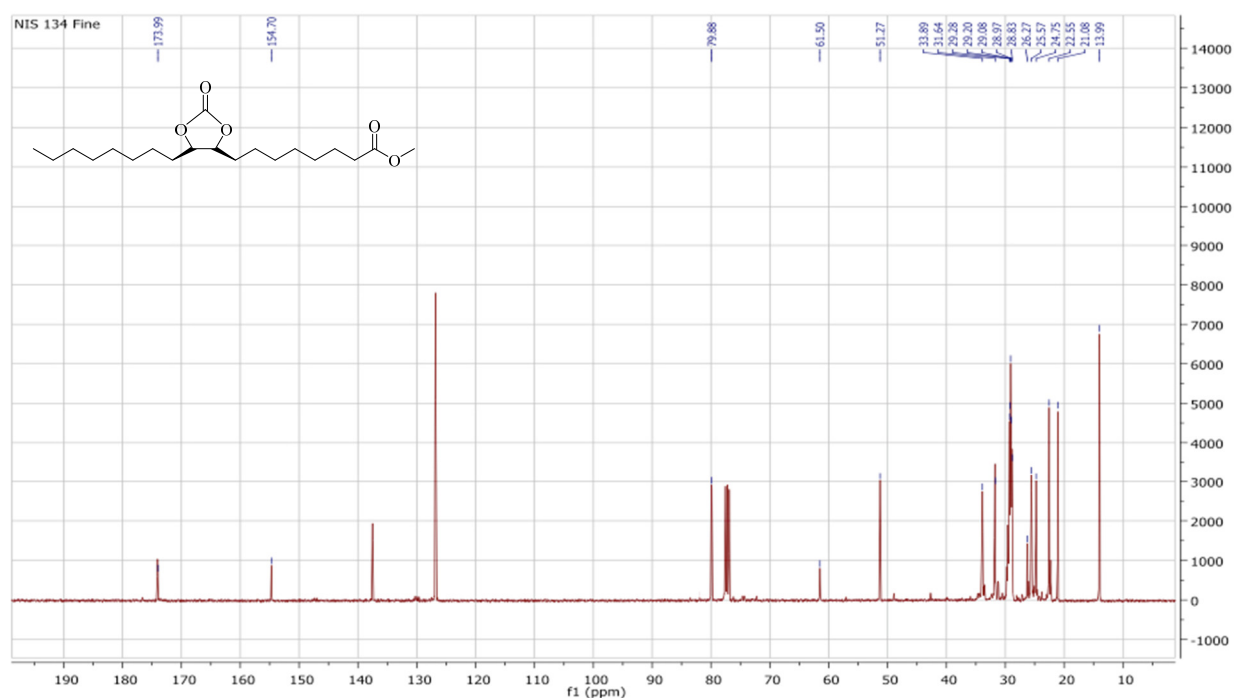

**Figure S33.**  $^{13}\text{C}$ -NMR (100MHz,  $\text{CDCl}_3$ ):  $\delta$  = 13.99, 21.08, 22.25, 22.57, 24.75, 25.57, 26.27, 28.83, 28.97, 29.01, 29.08, 29.20, 29.28, 31.64, 33.89, 51.27, 61.50, 79.88, 154.70, 173.99.

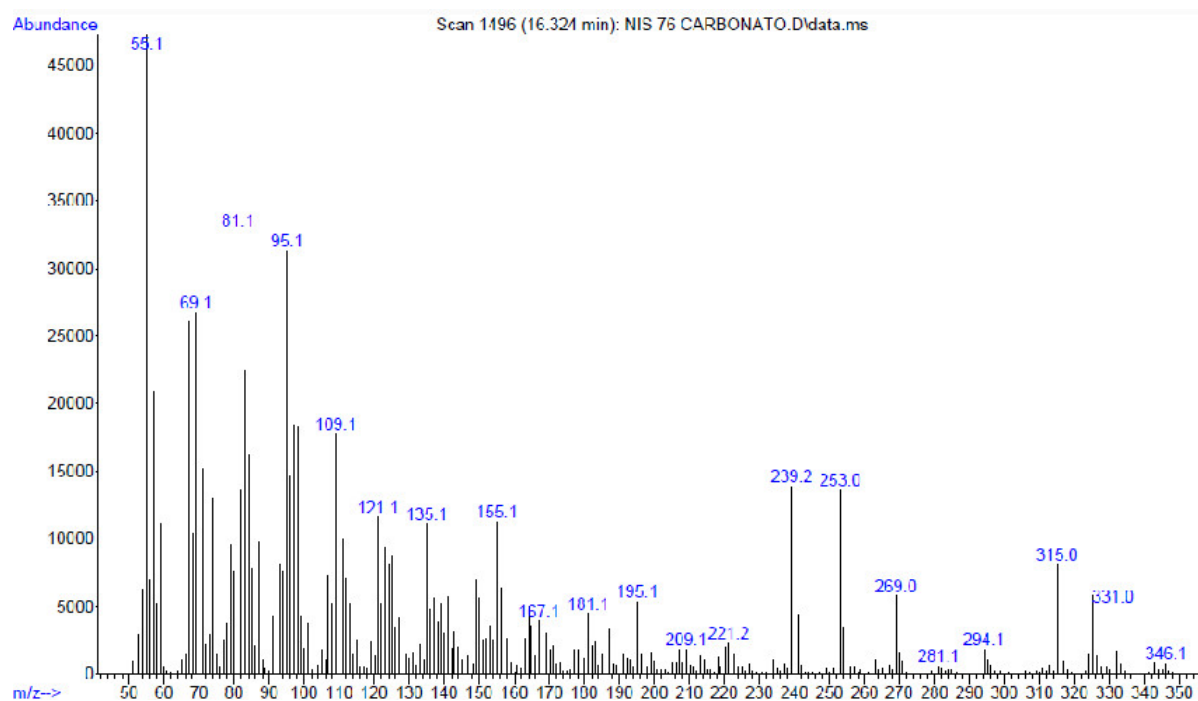

**Figure S34.** MS spectra of Carbonated Methyl Oleate (CMO).
